# Supplementary material for: Divergent synthesis of novel 9-deazaxanthine derivatives via late-stage cross-coupling reactions
Source: Royal Society of Chemistry journal article supplement (doi:10.1039/c2ob26516h), 2012-01-01

# Divergent Synthesis of Novel 9-Deazaxanthine Derivatives via Late-Stage Cross-Coupling Reactions

**Giovanni Piersanti,<sup>\*,§</sup> Francesca Bartoccini,<sup>§</sup> Marco Mor,<sup>‡</sup> Giorgio Tarzia,<sup>§</sup> Patrizia  
Minetti,<sup>\*,†</sup> and Walter Cabri<sup>†</sup>**

<sup>§</sup>*Department of Biomolecular Sciences, University of Urbino, P.zza Rinascimento 6, 61029 Urbino (PU), Italy,*

<sup>†</sup>*Chemistry & Analytical Development Department, Sigma-Tau, Via Pontina Km 30,400, 00040 Pomezia, Roma, Italy*

*and Dipartimento Farmaceutico, Università degli Studi di Parma, Viale G.P.Usberti 27/A, I-43124 Parma, Italy*

[giovanni.piersanti@uniurb.it](mailto:giovanni.piersanti@uniurb.it); [patrizia.minetti@sigma-tau.it](mailto:patrizia.minetti@sigma-tau.it)

### Compound 2

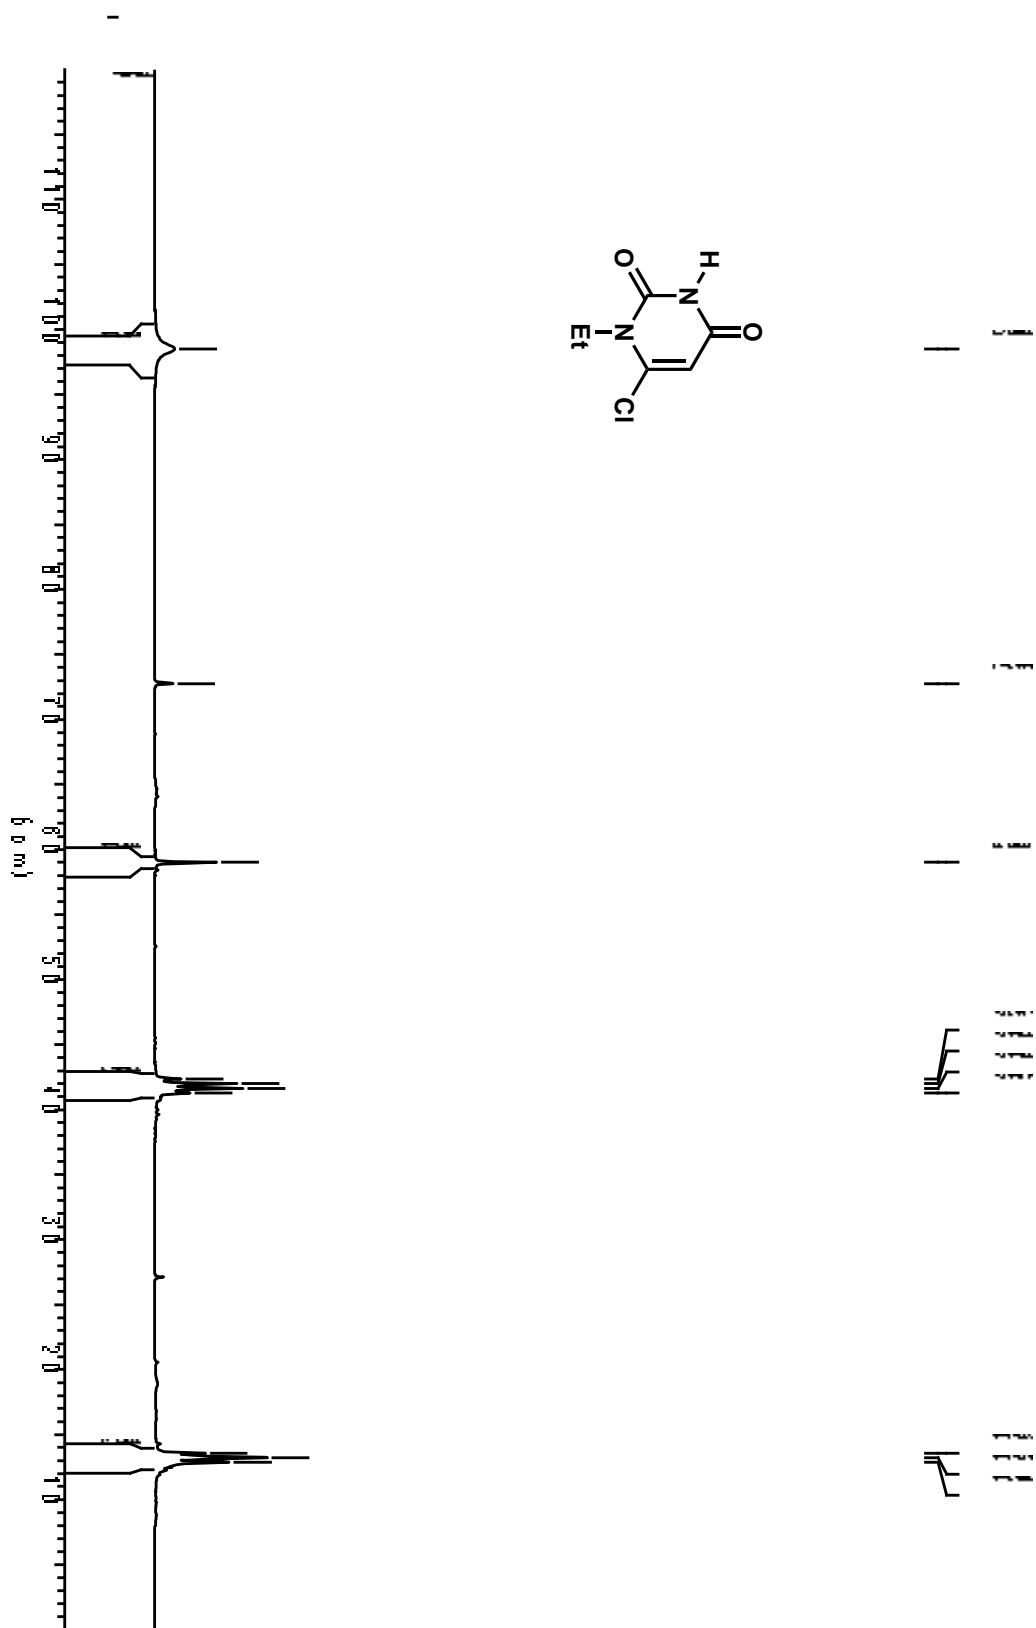

Compound 3b

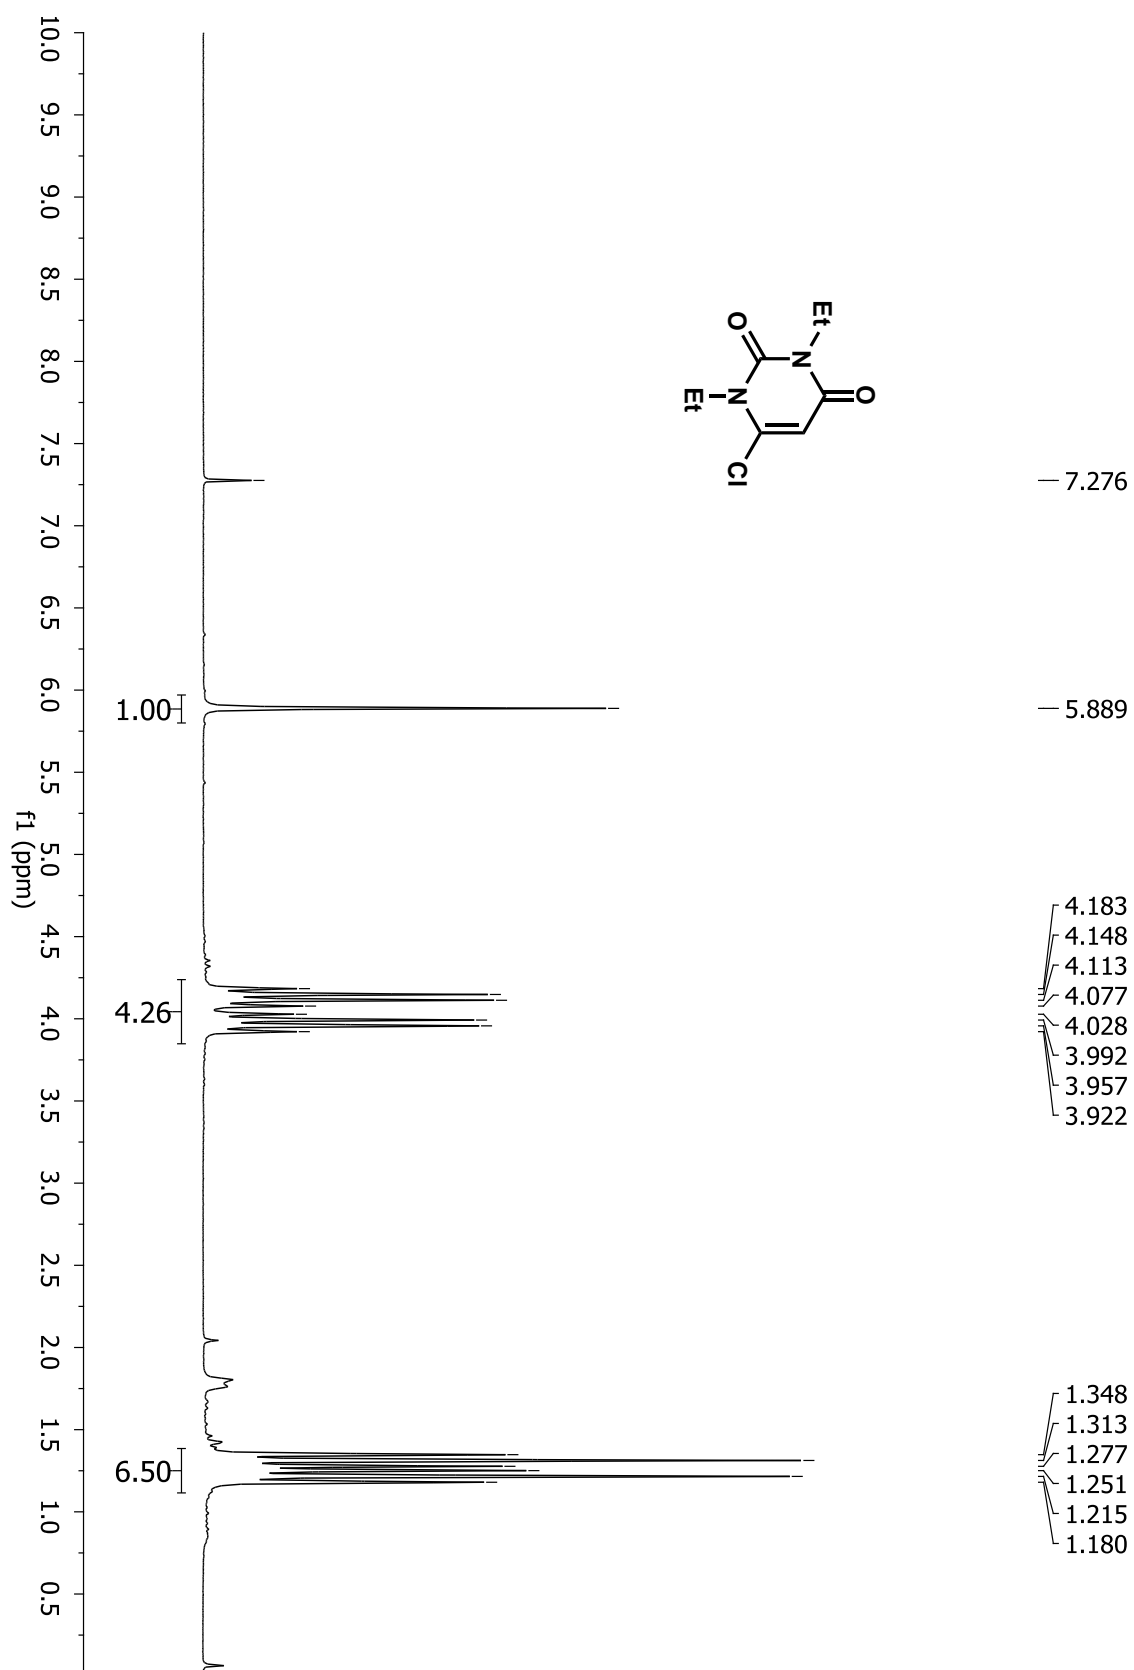

Compound 3b

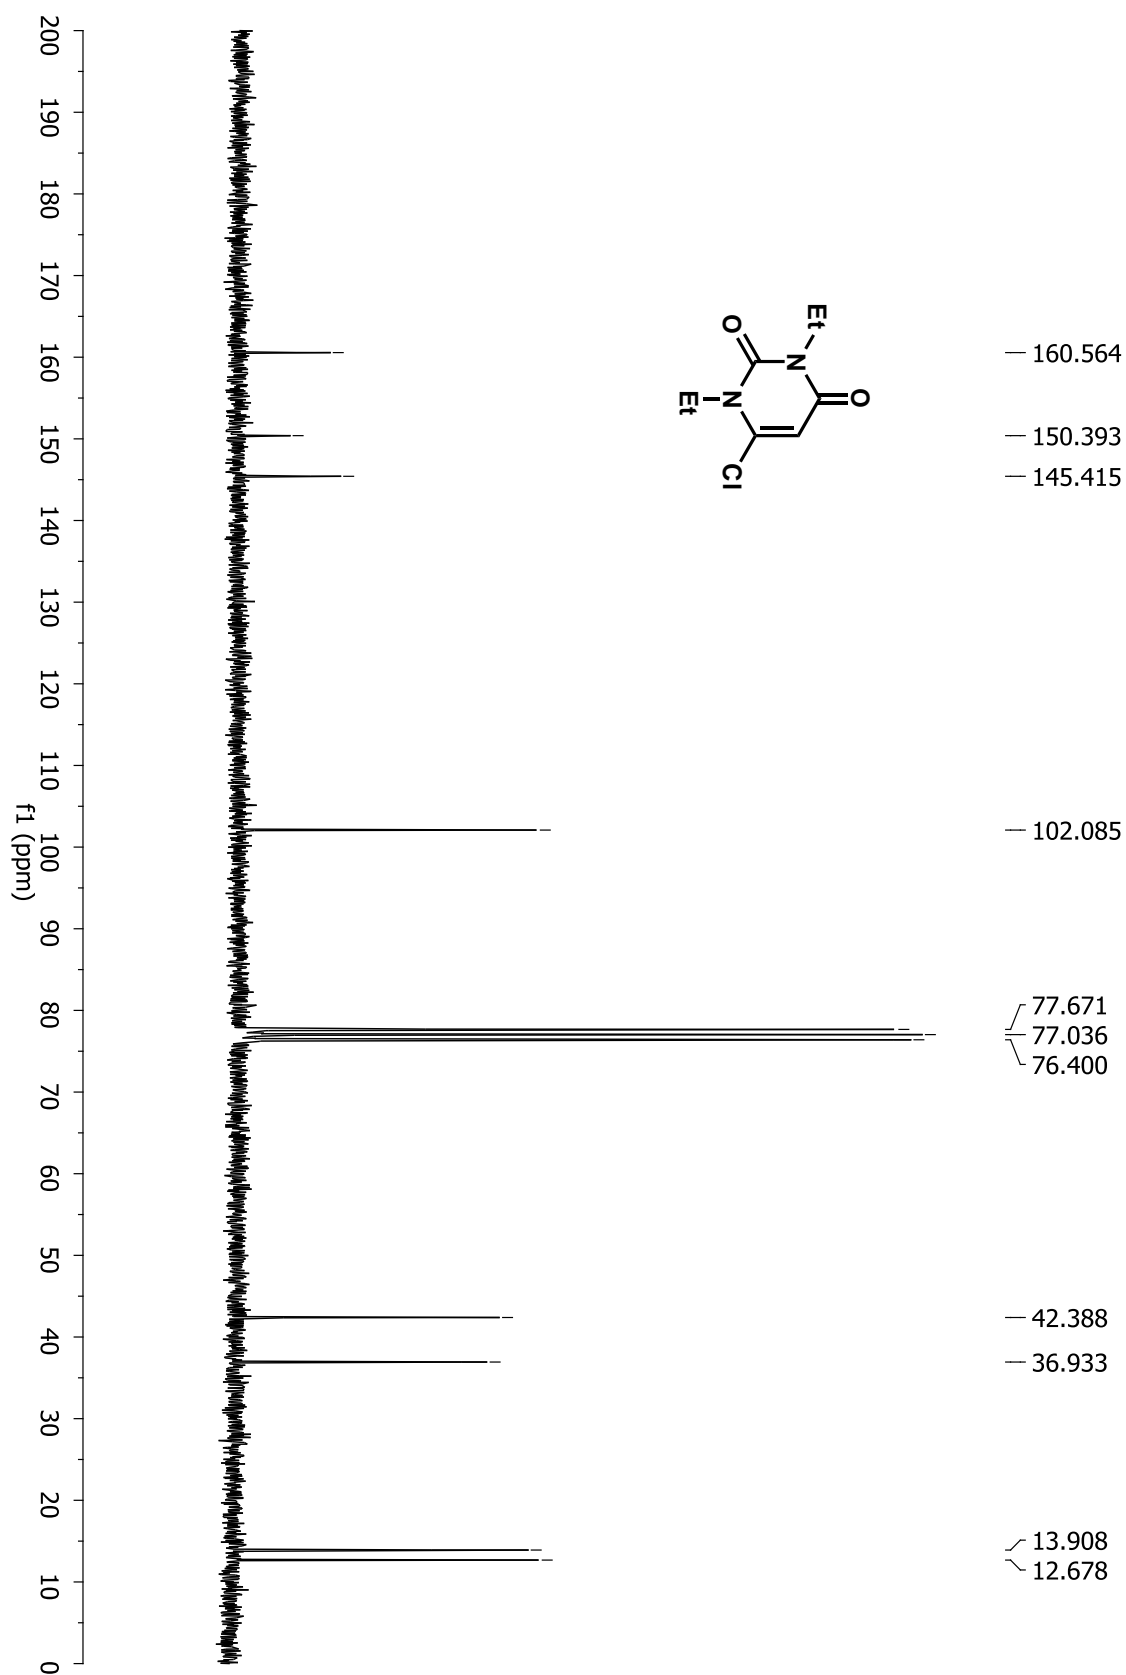

Compound 6a

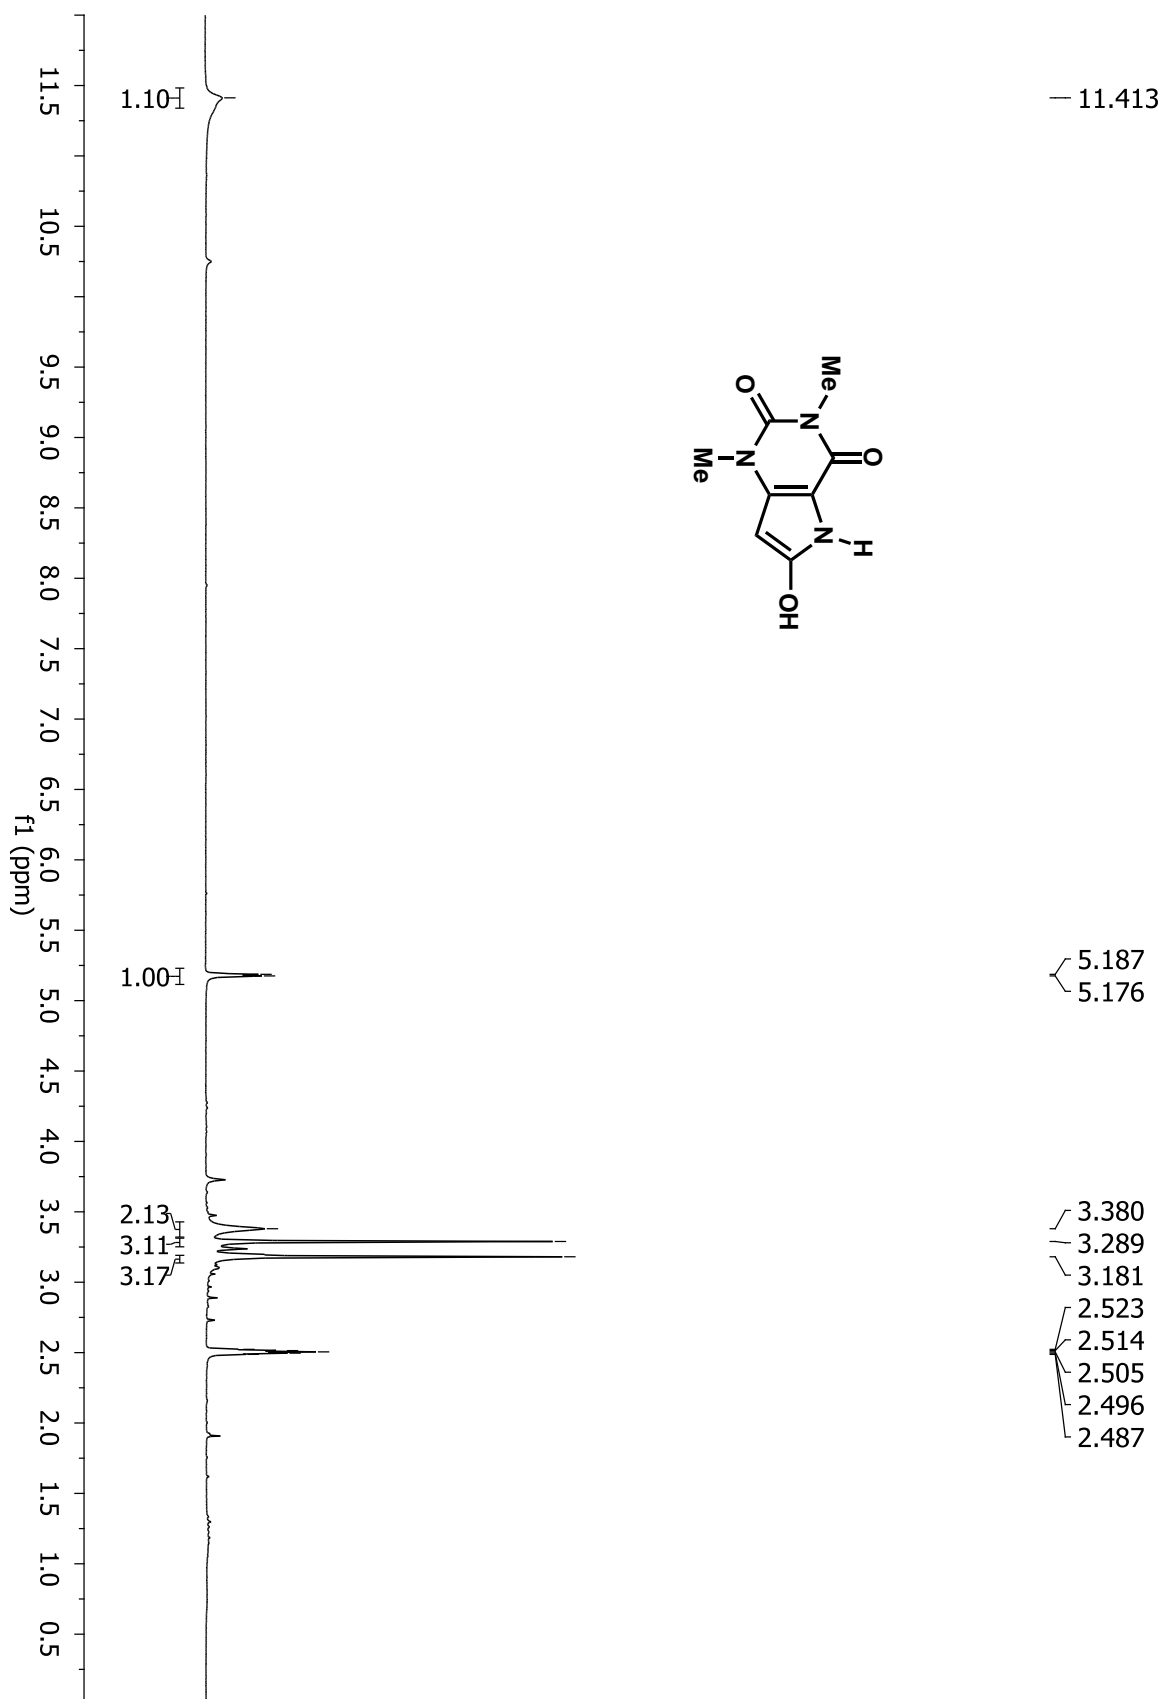

Compound 6a

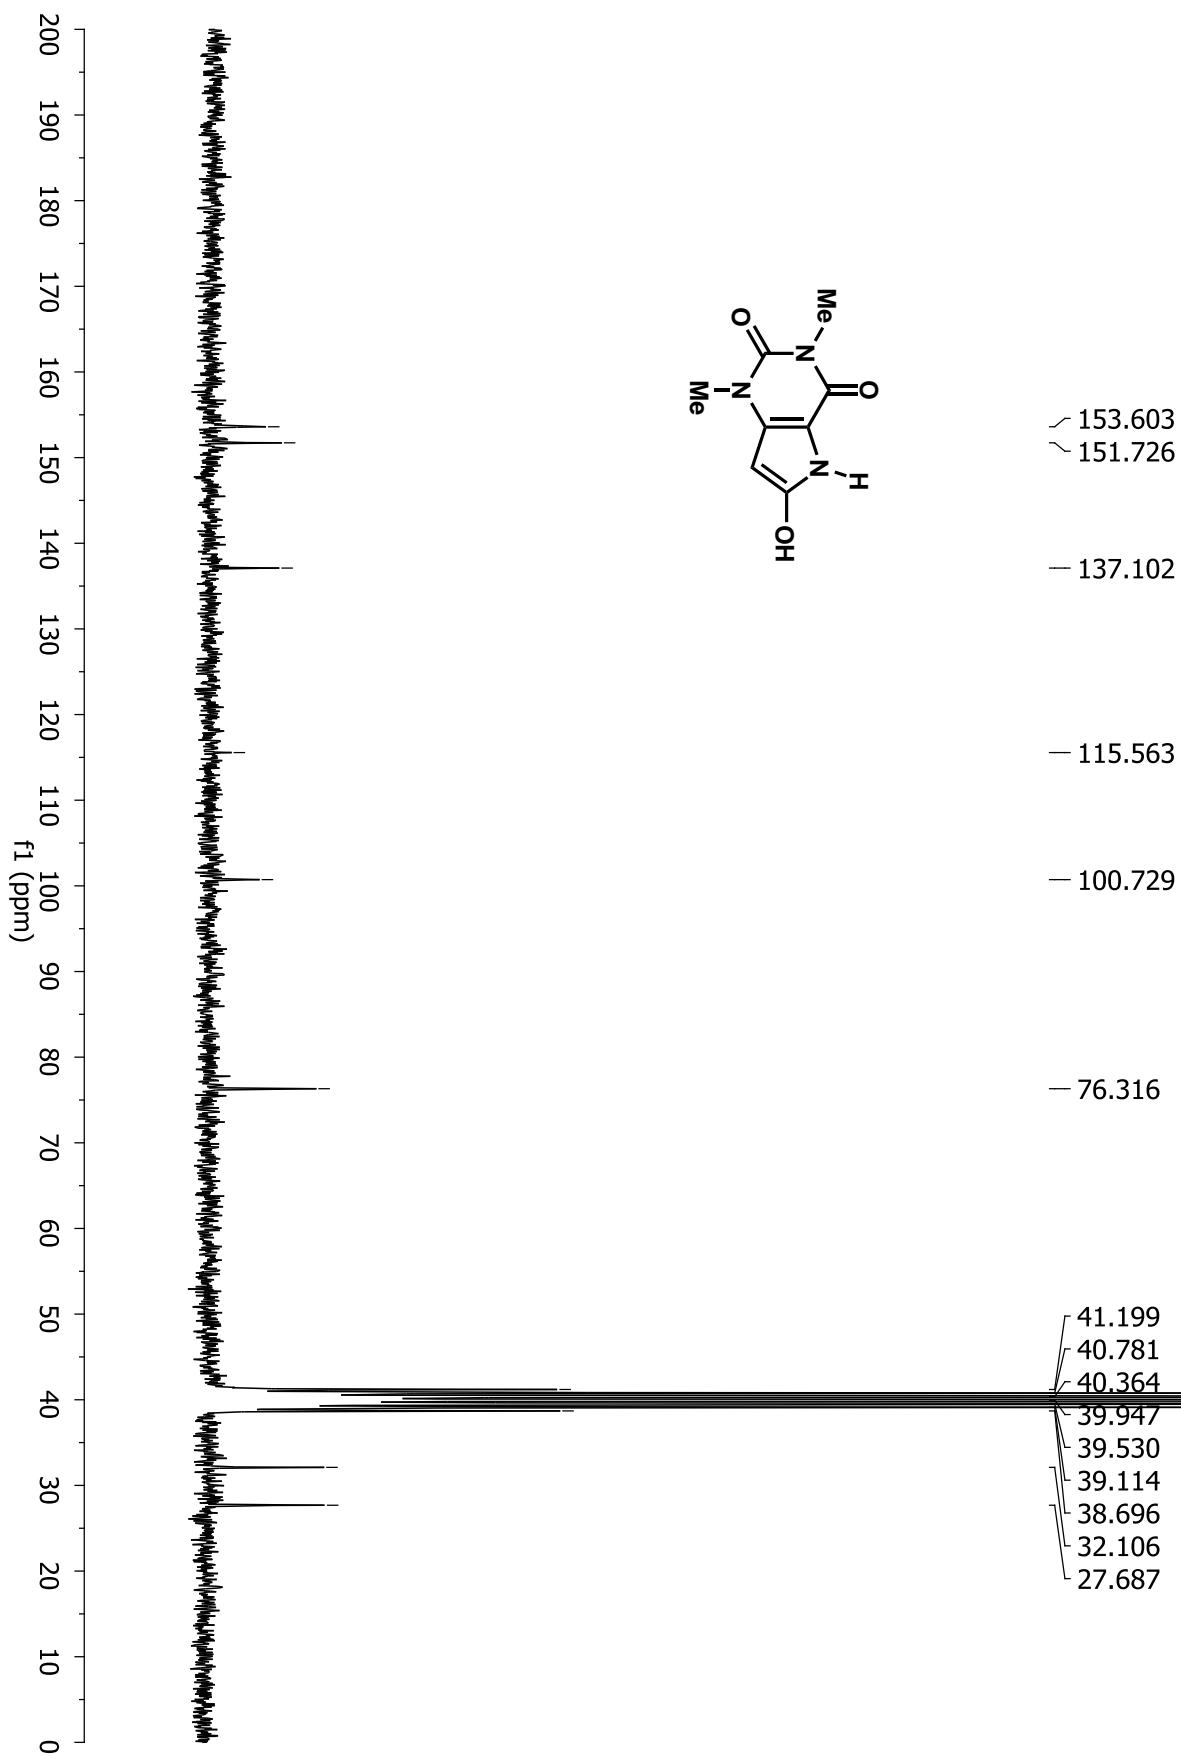

Compound 6b

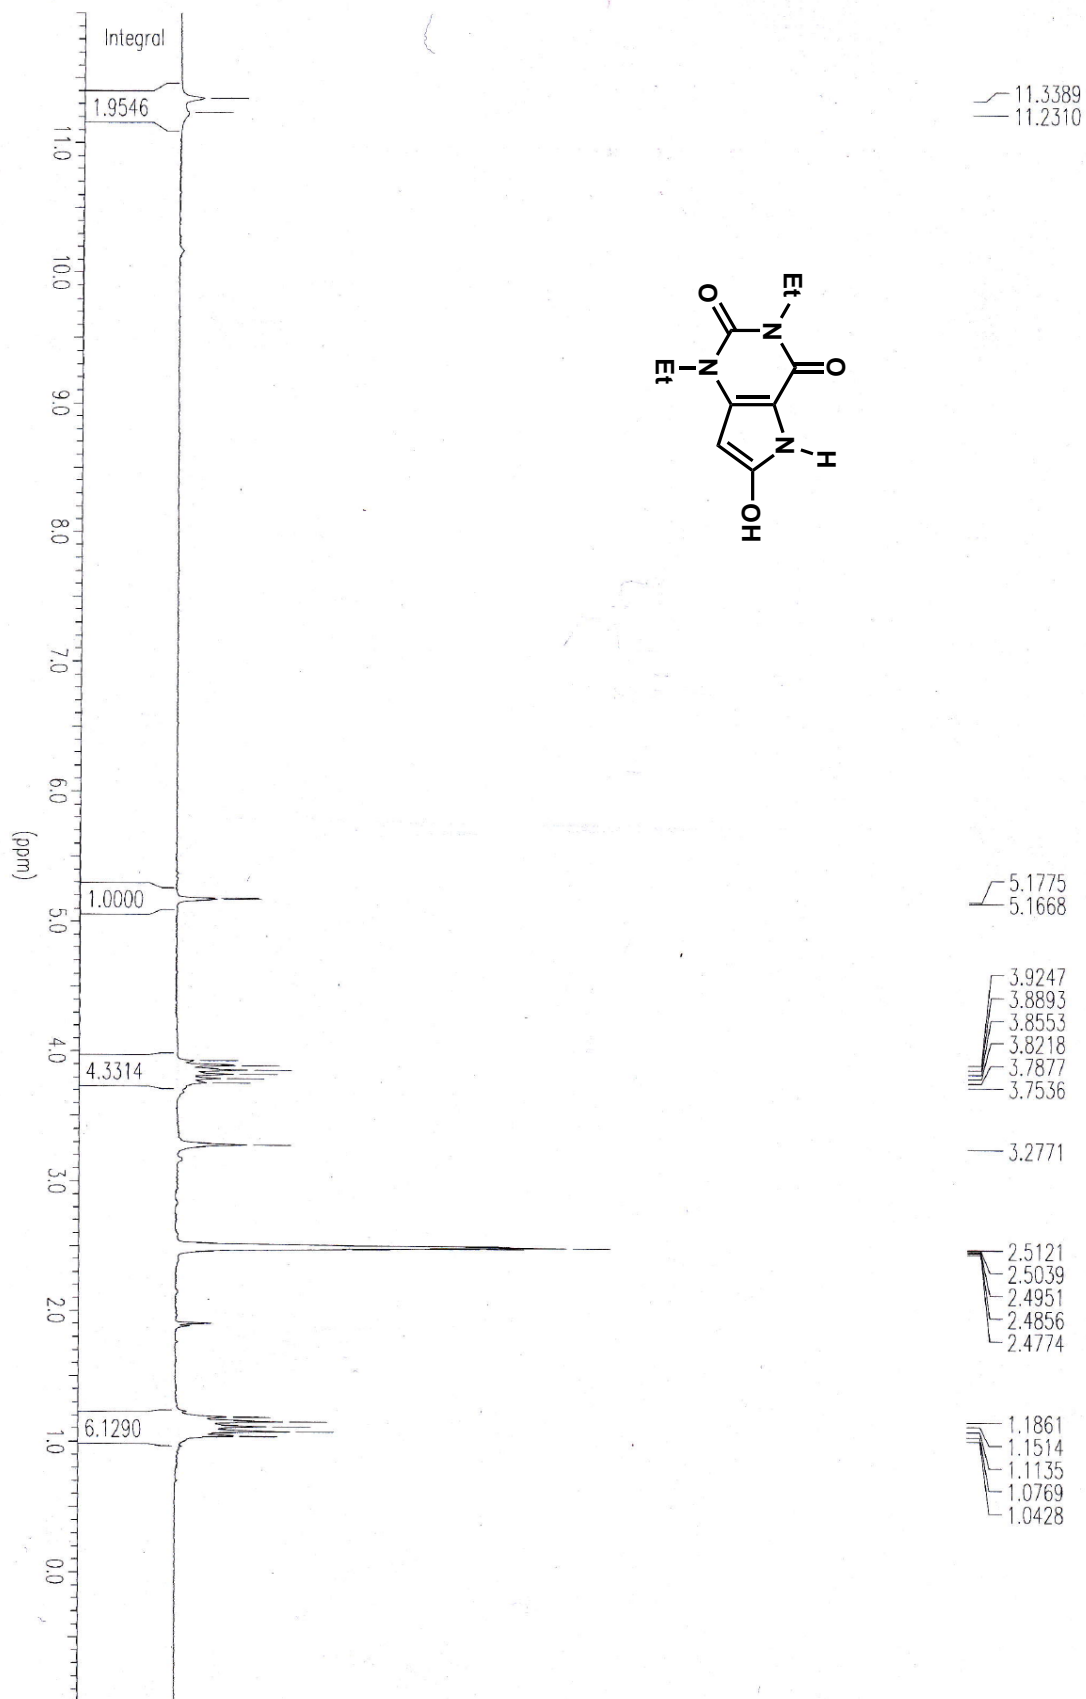

Compound 6b

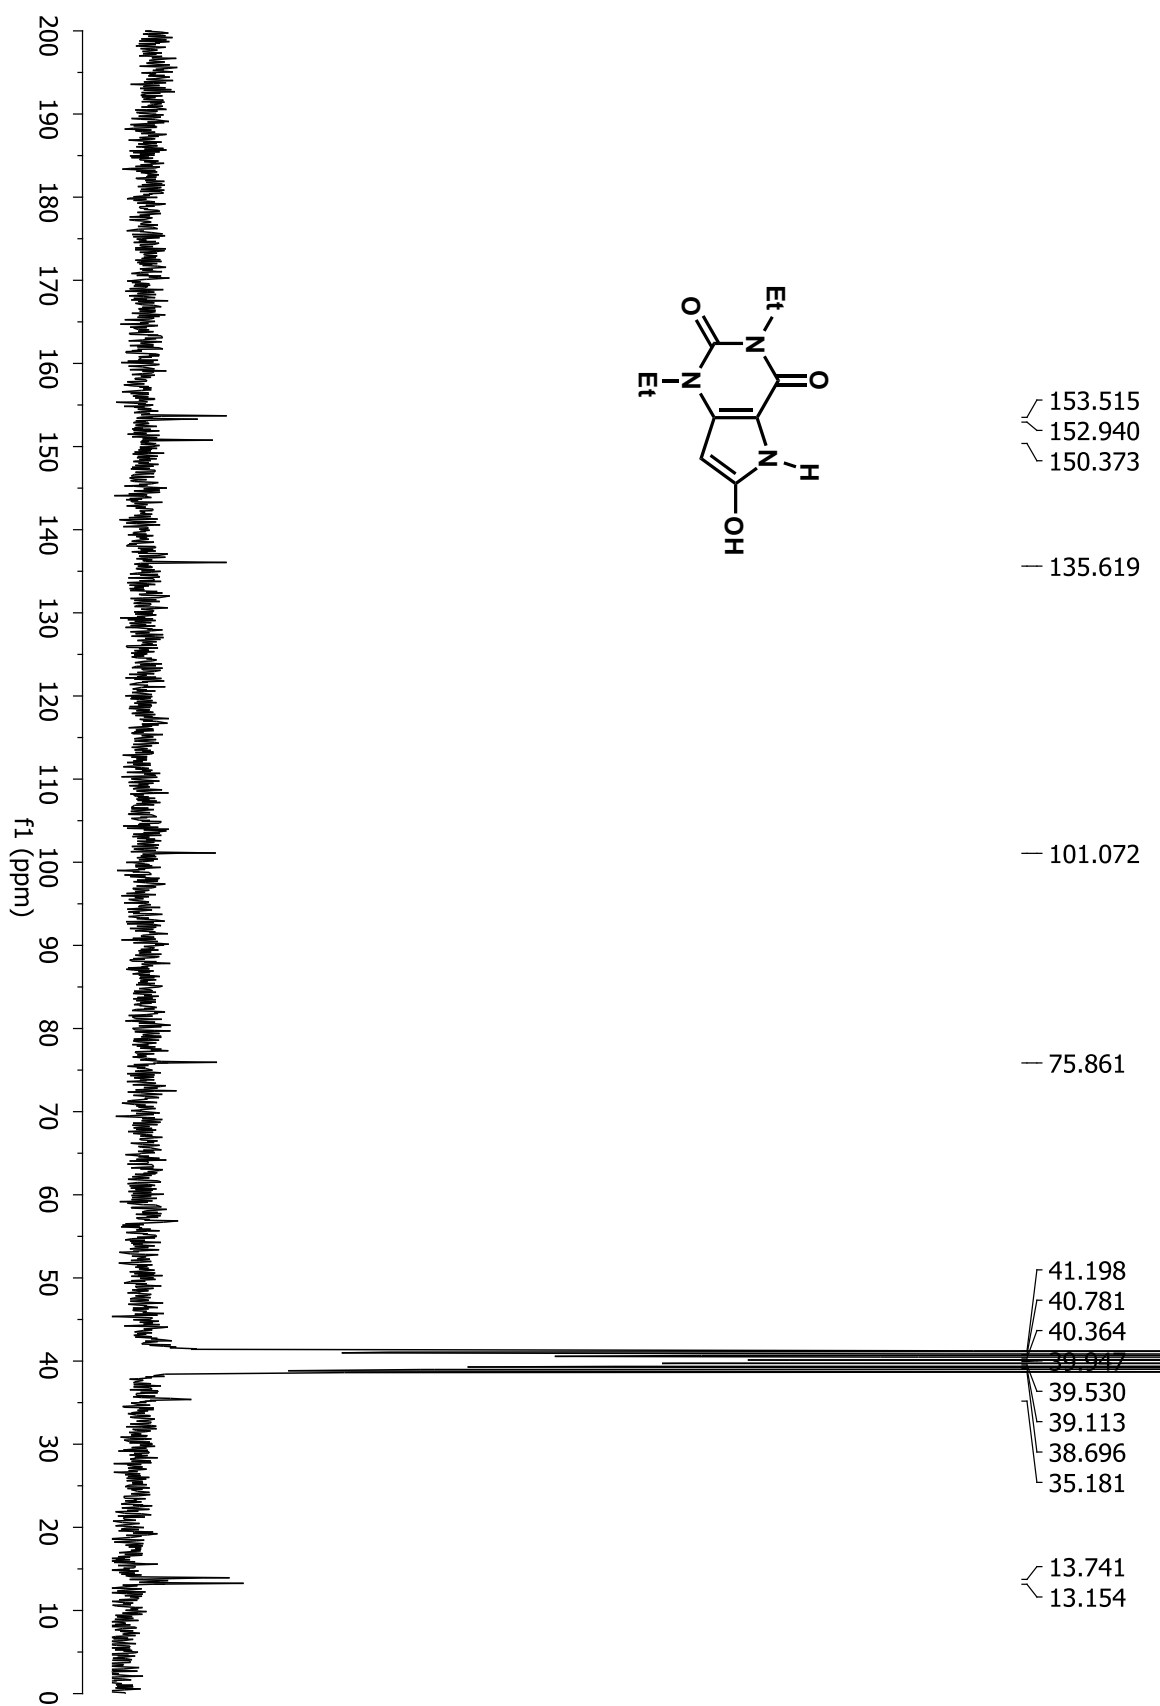



Compound 7a

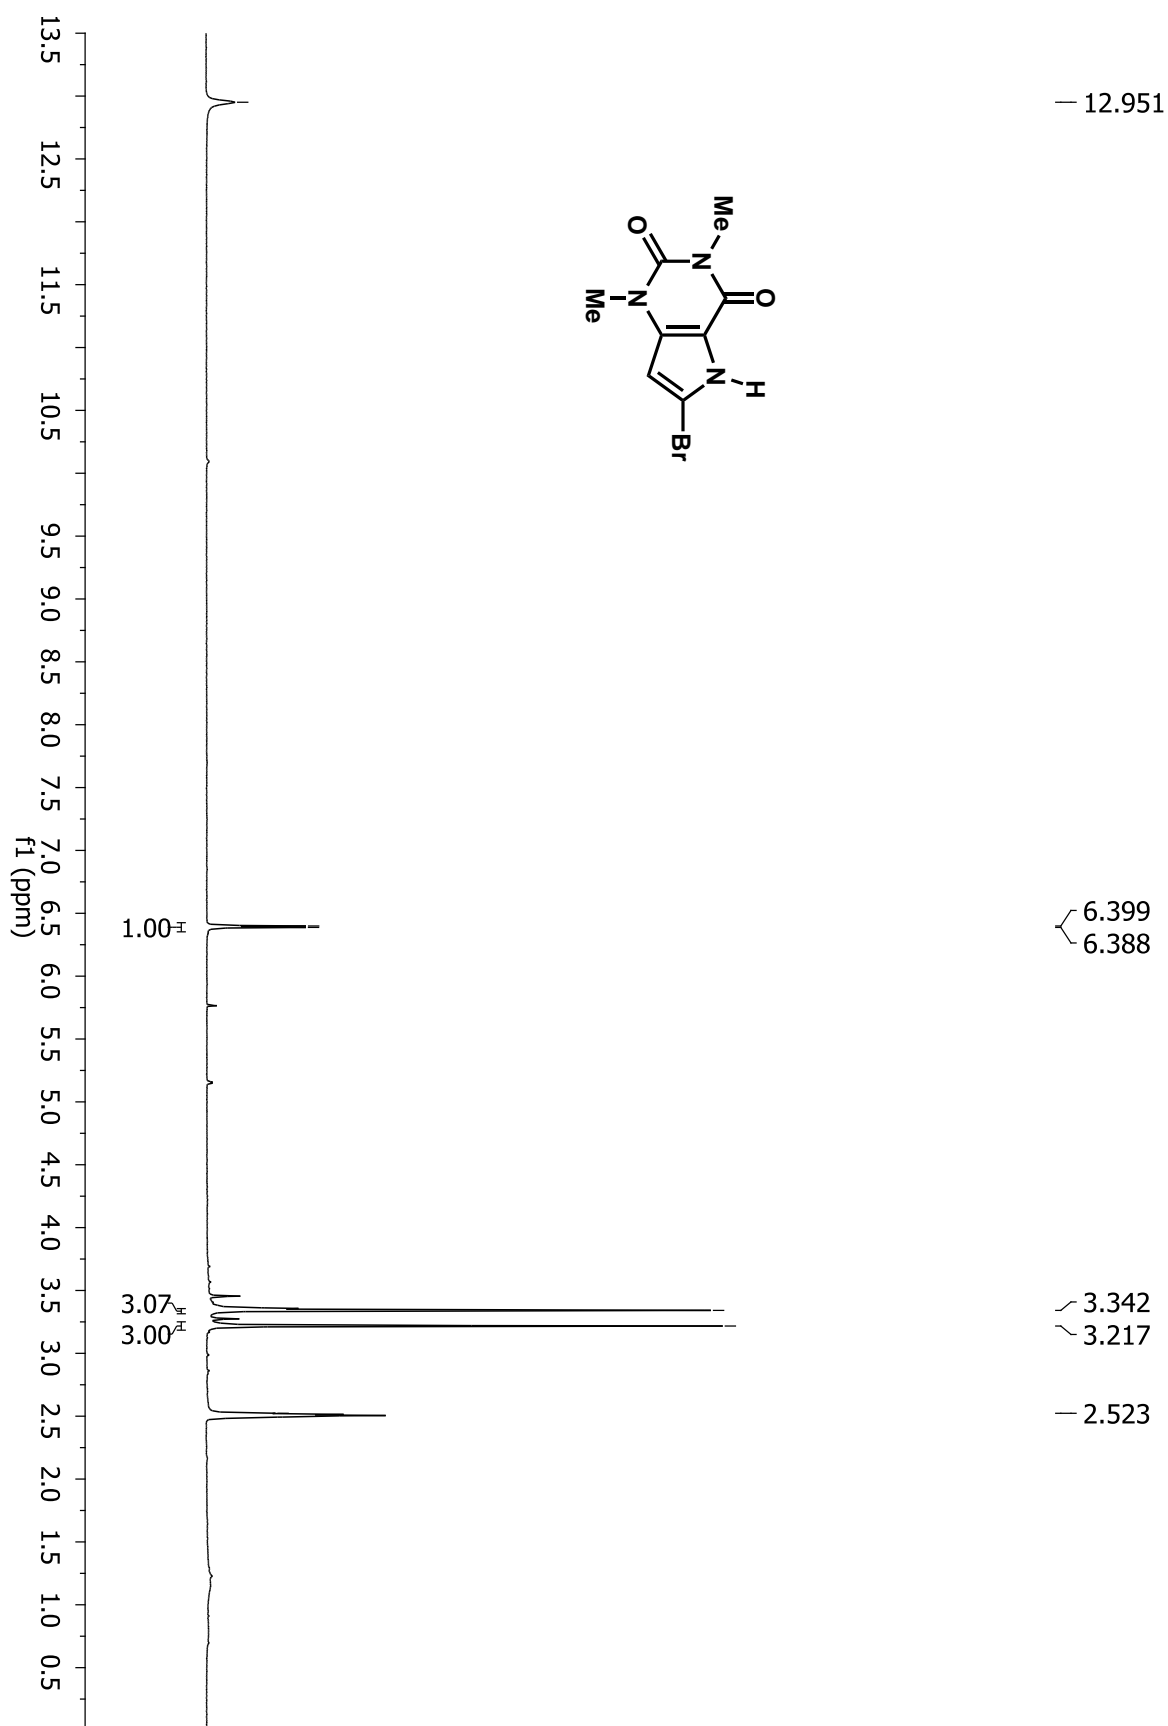

Compound 7a

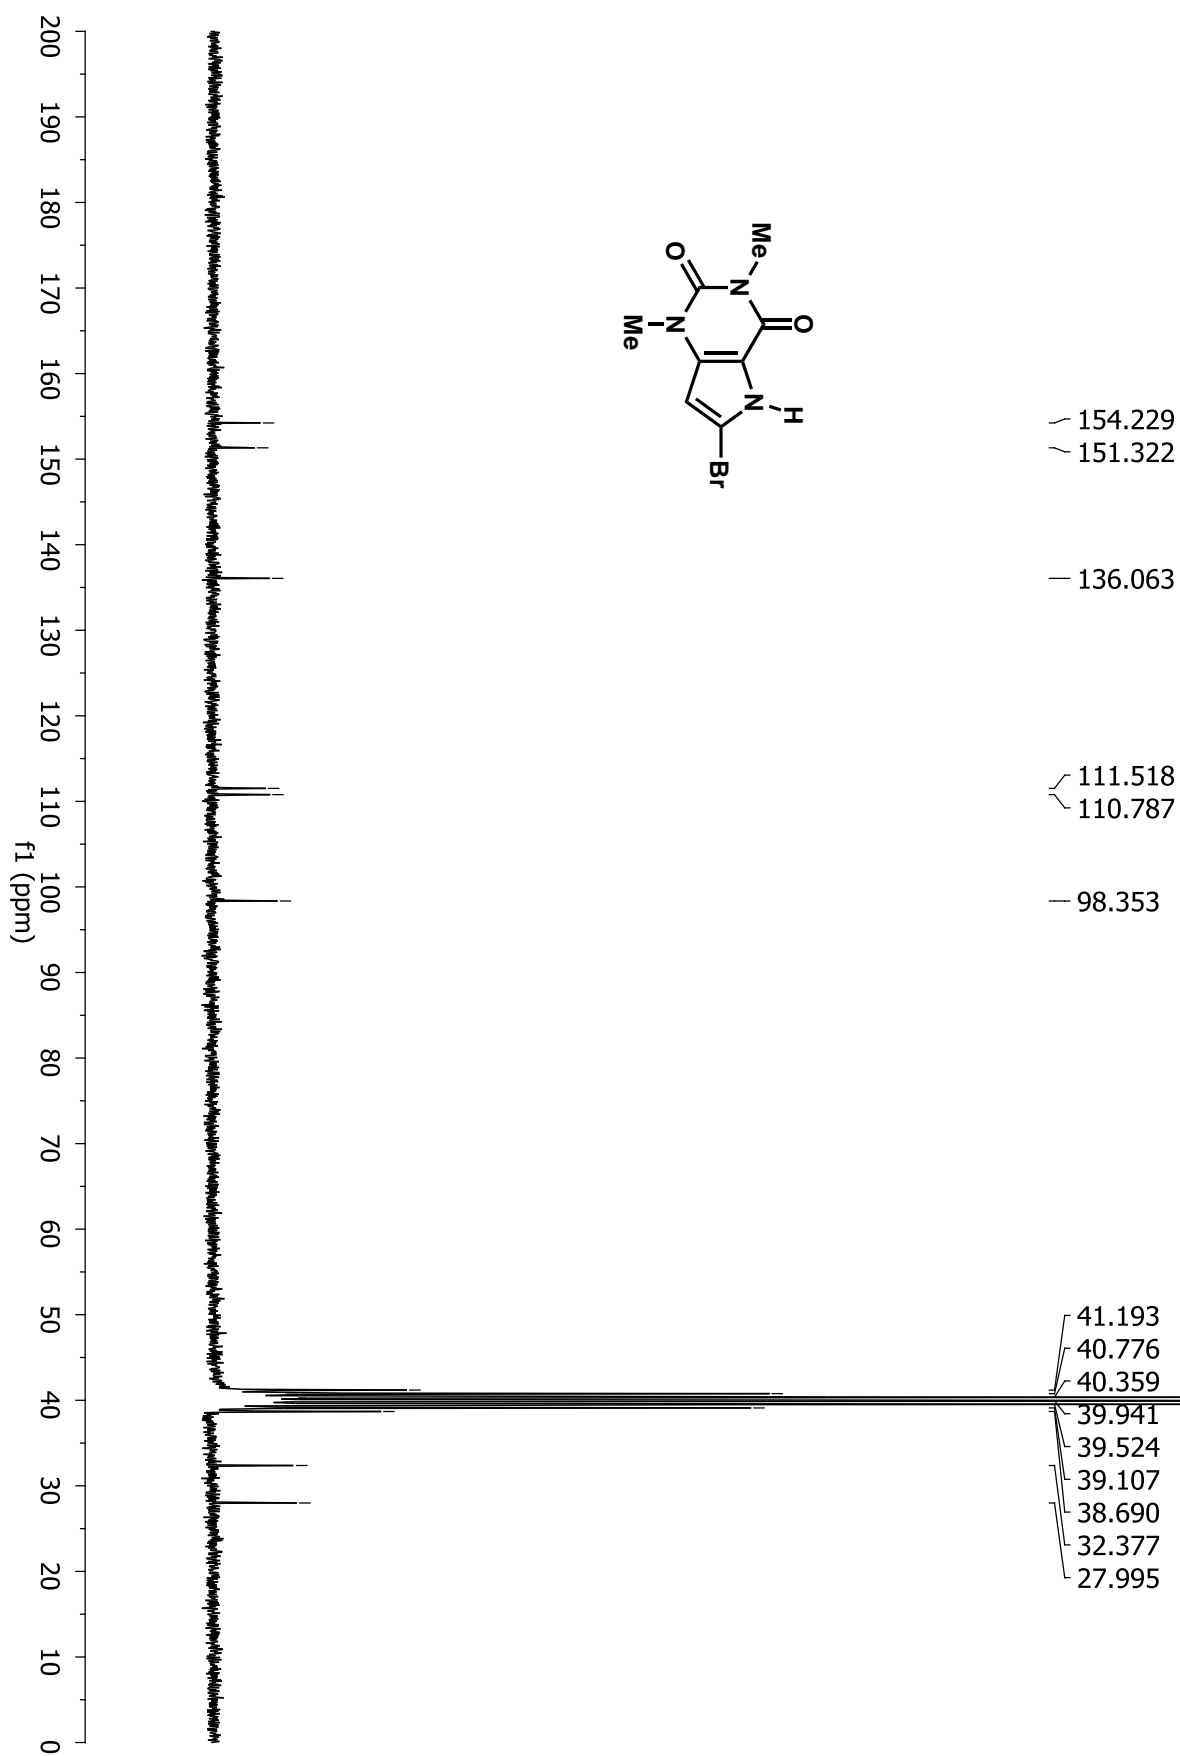

Compound 7b

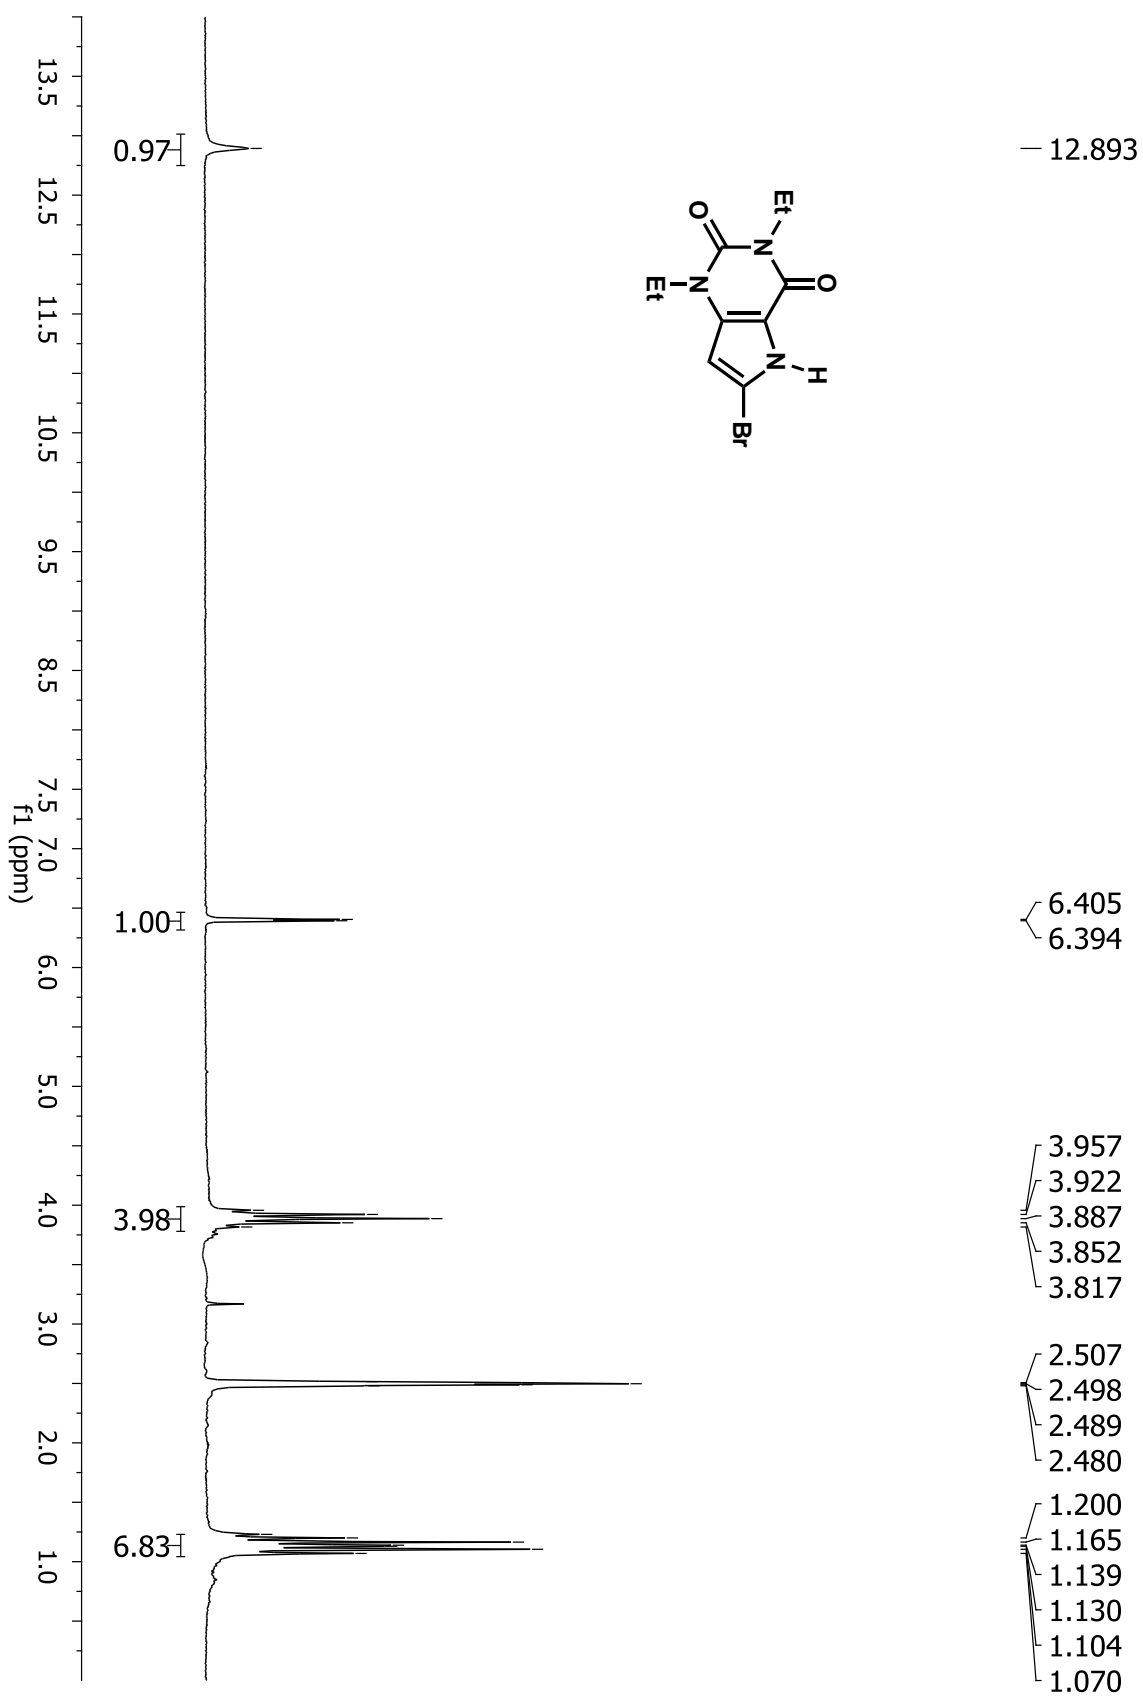

Compound 7b

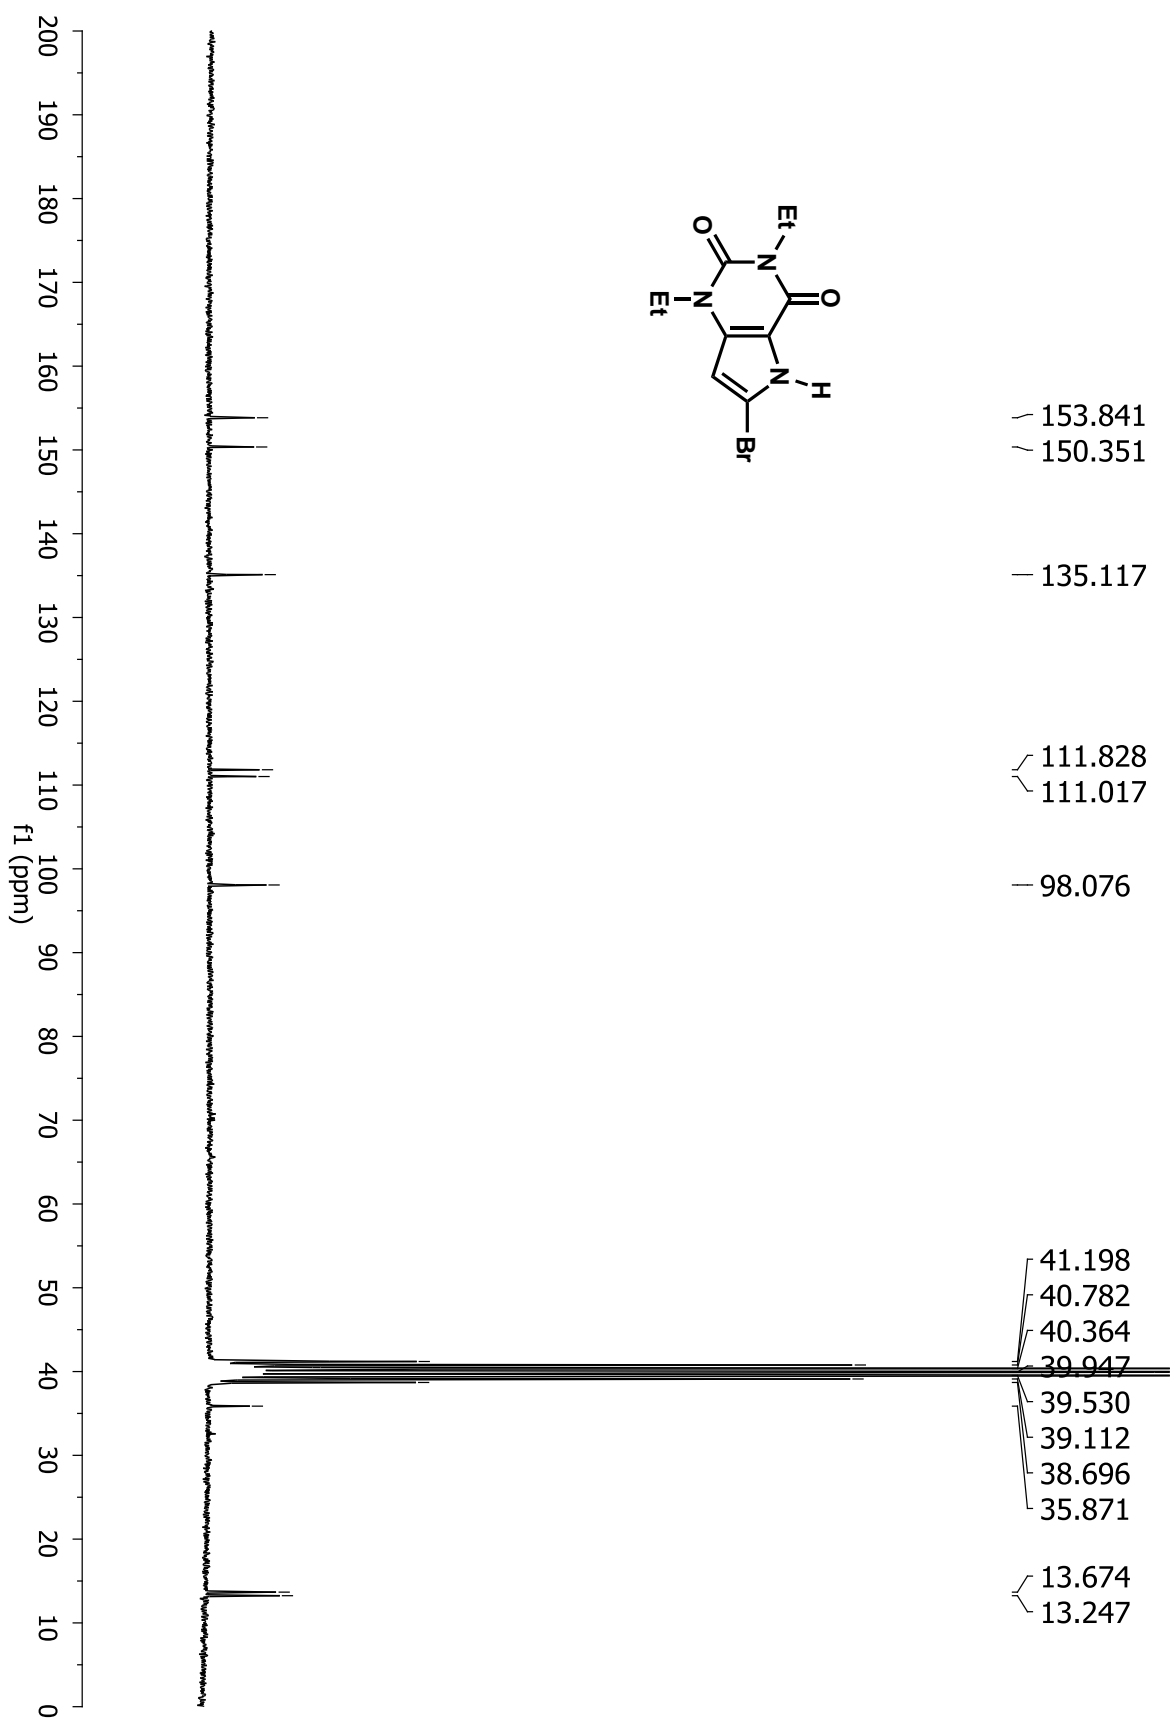

Compound 8a

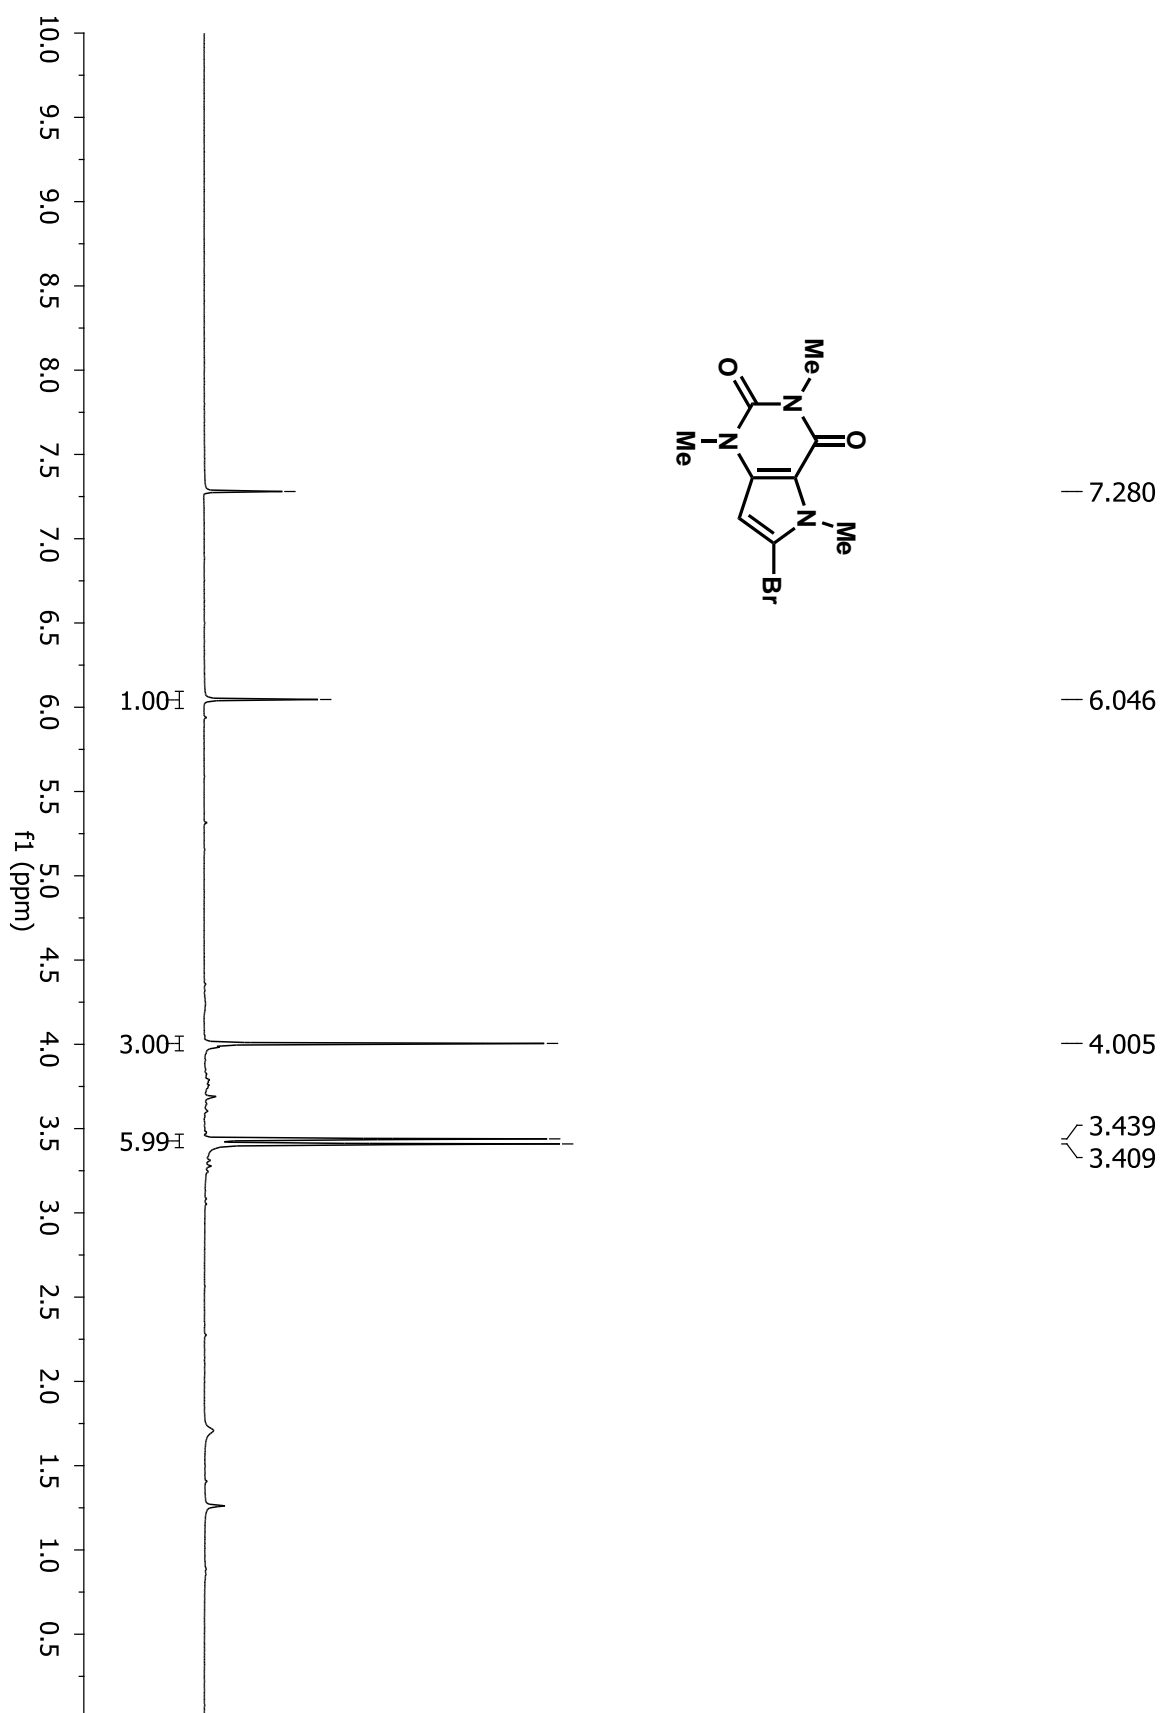

Compound 8a

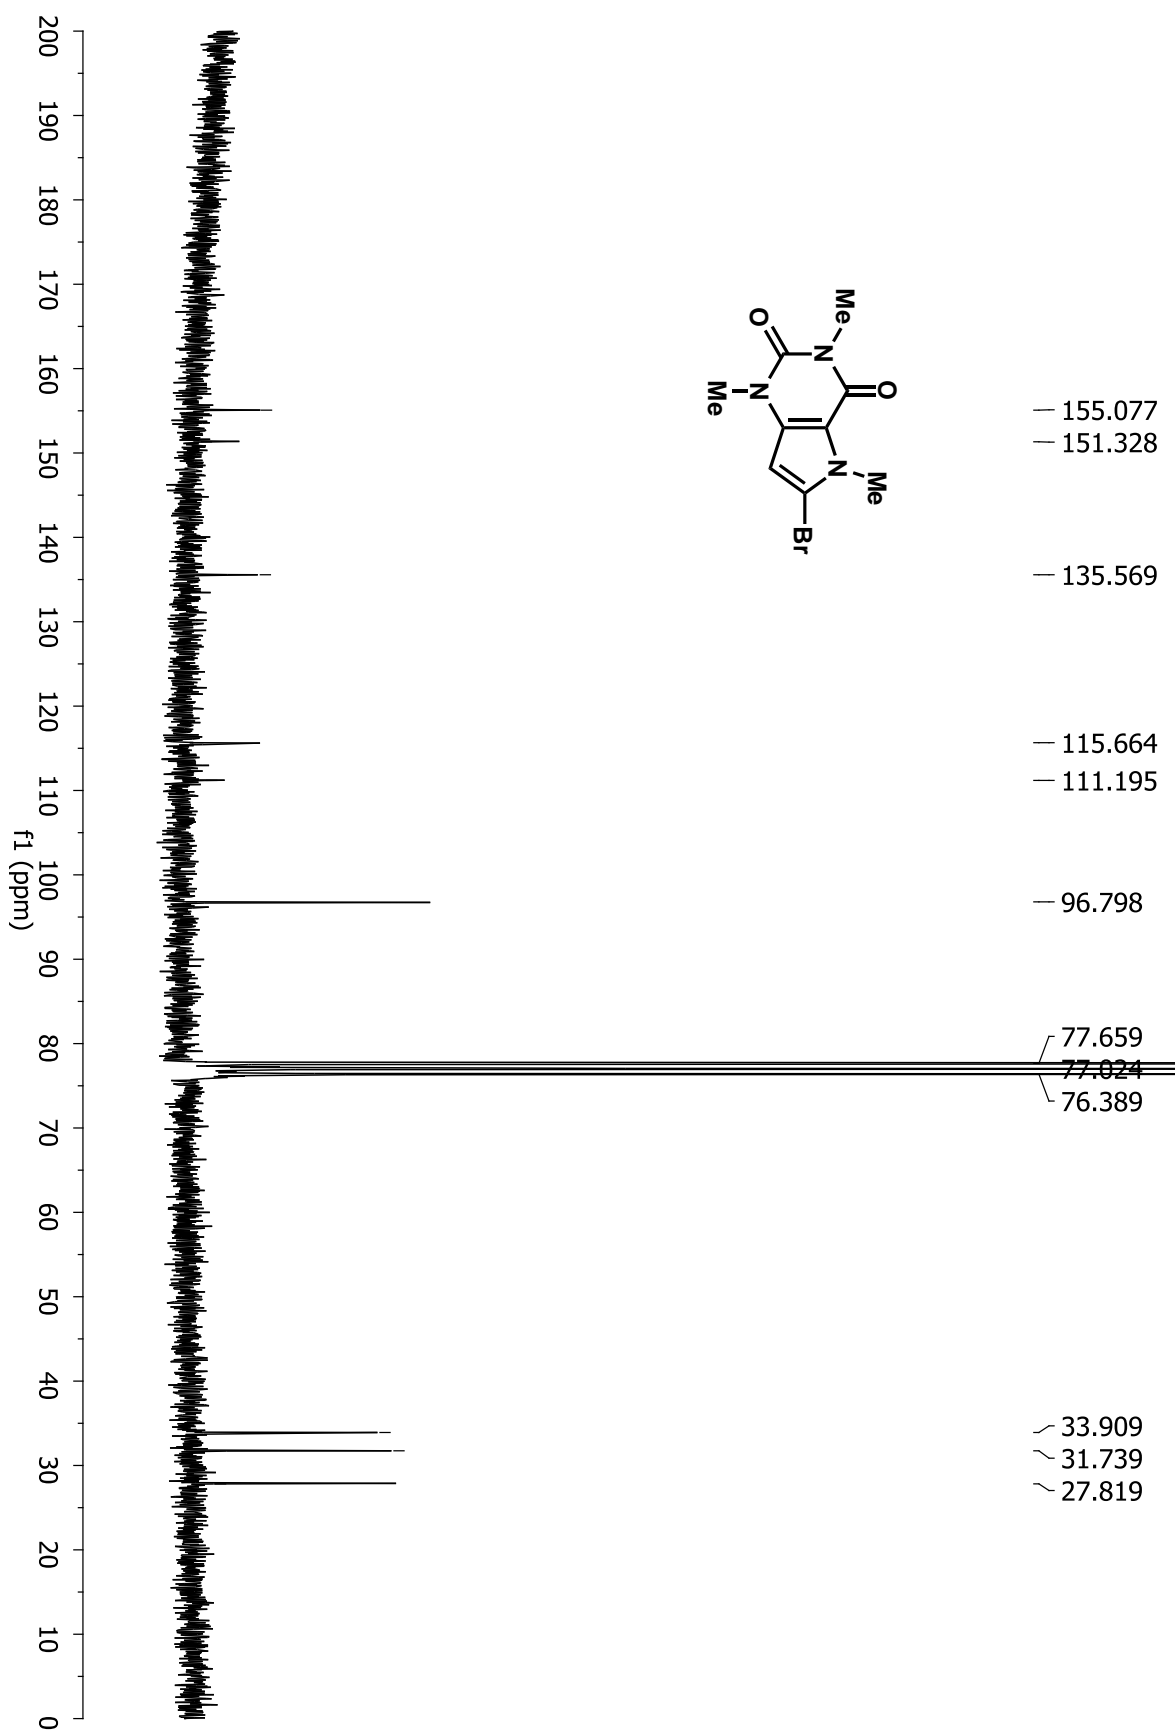

Compound 8b

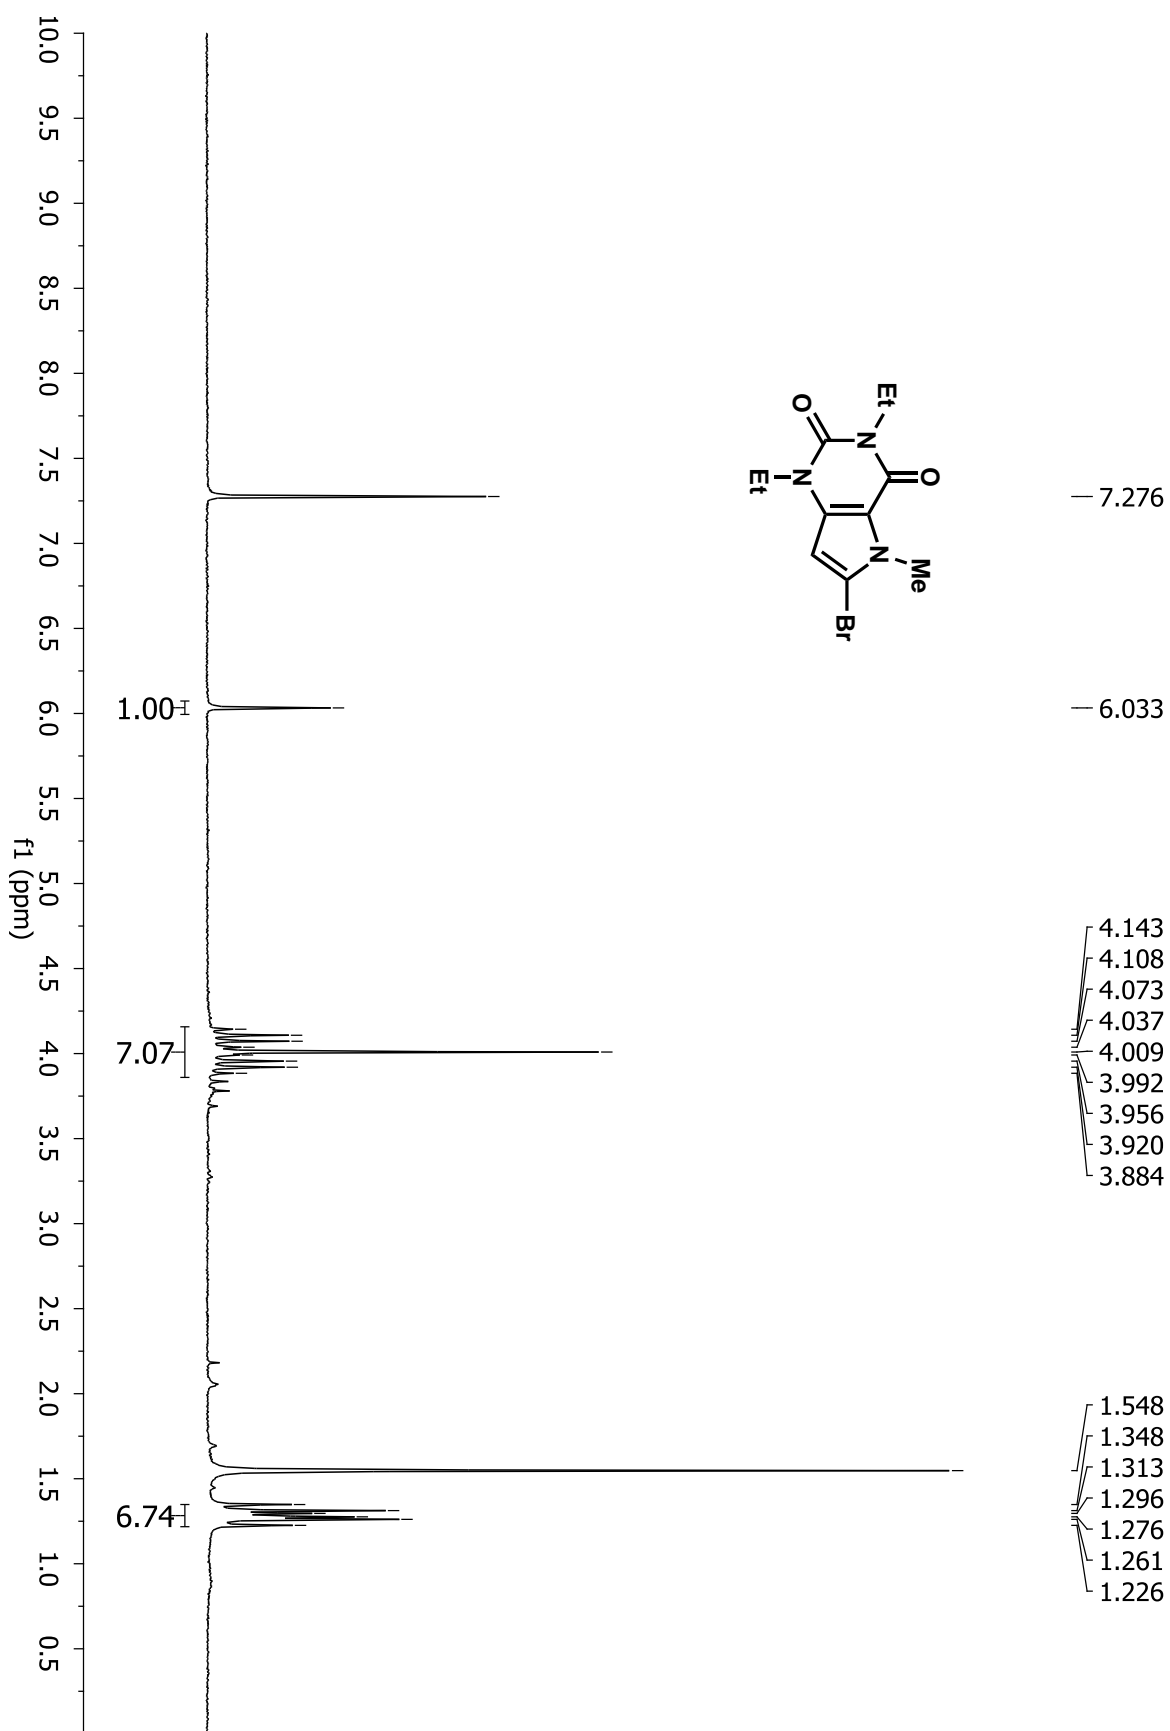

Compound 8b

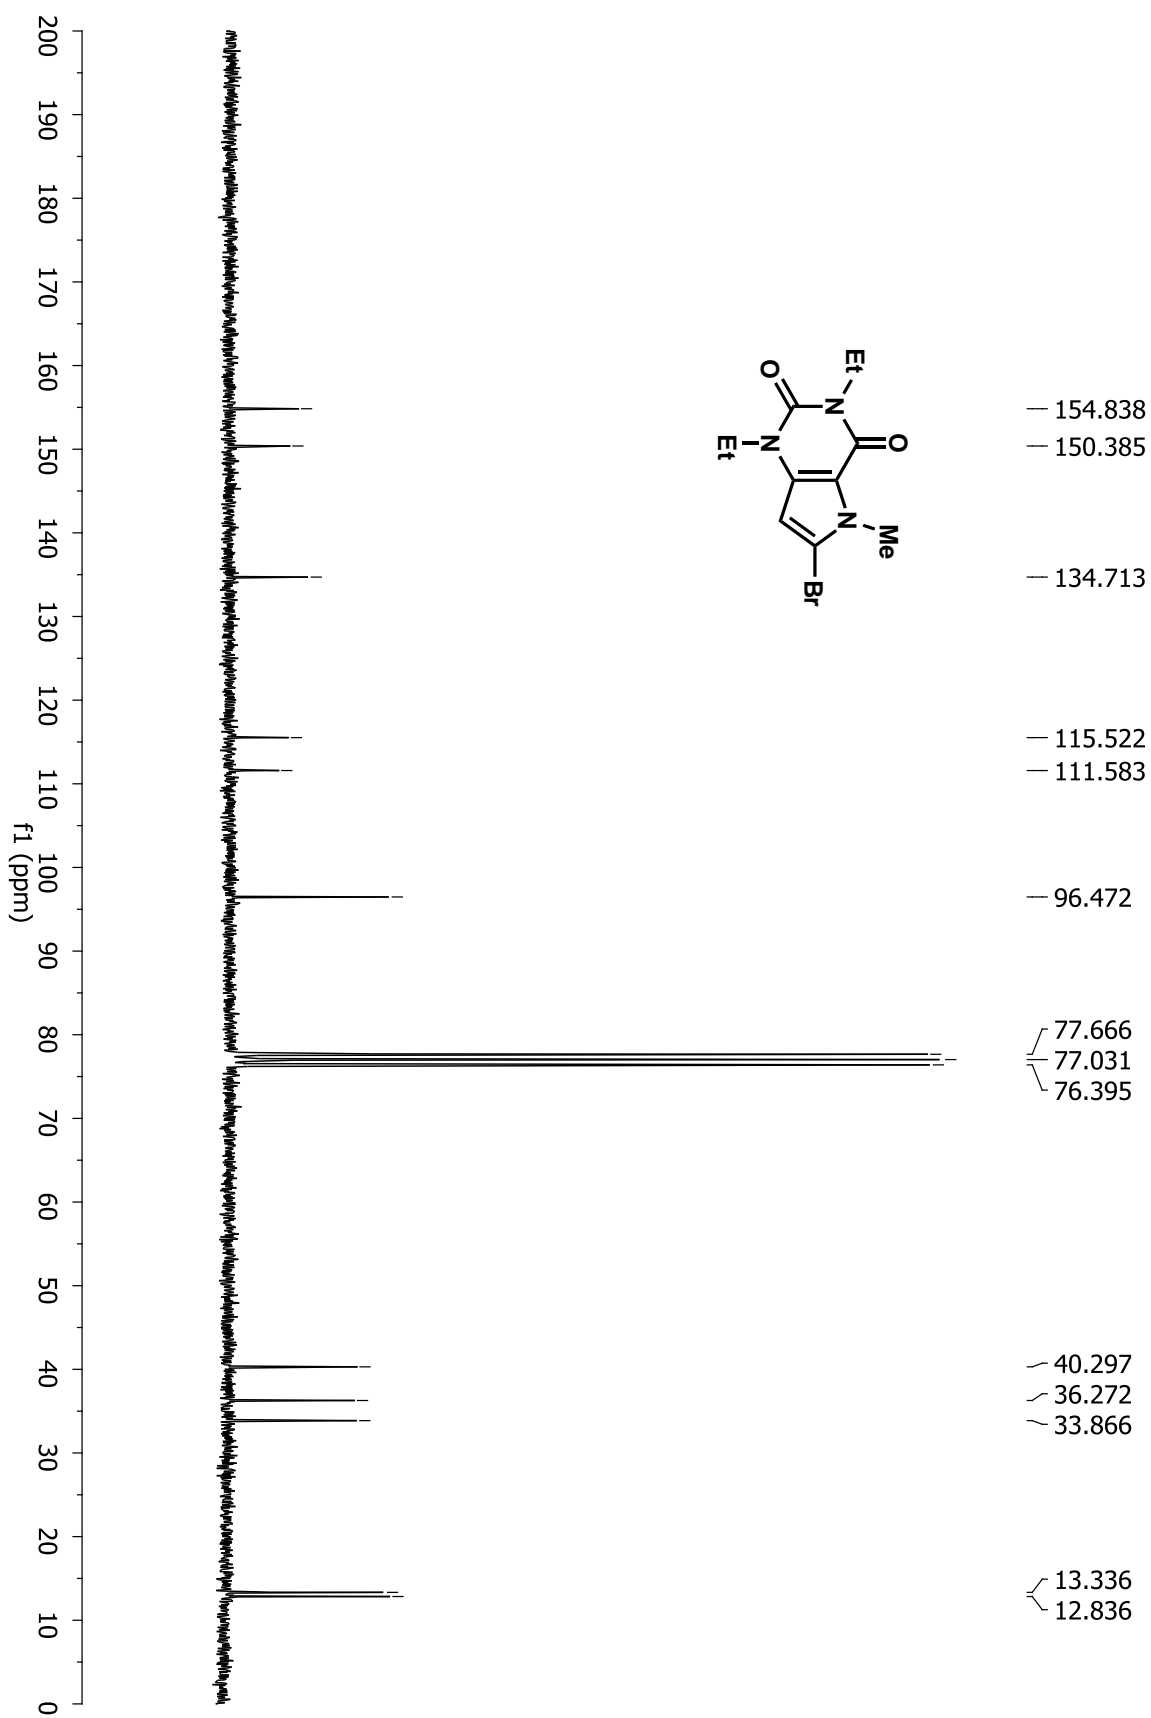



Compound 8c

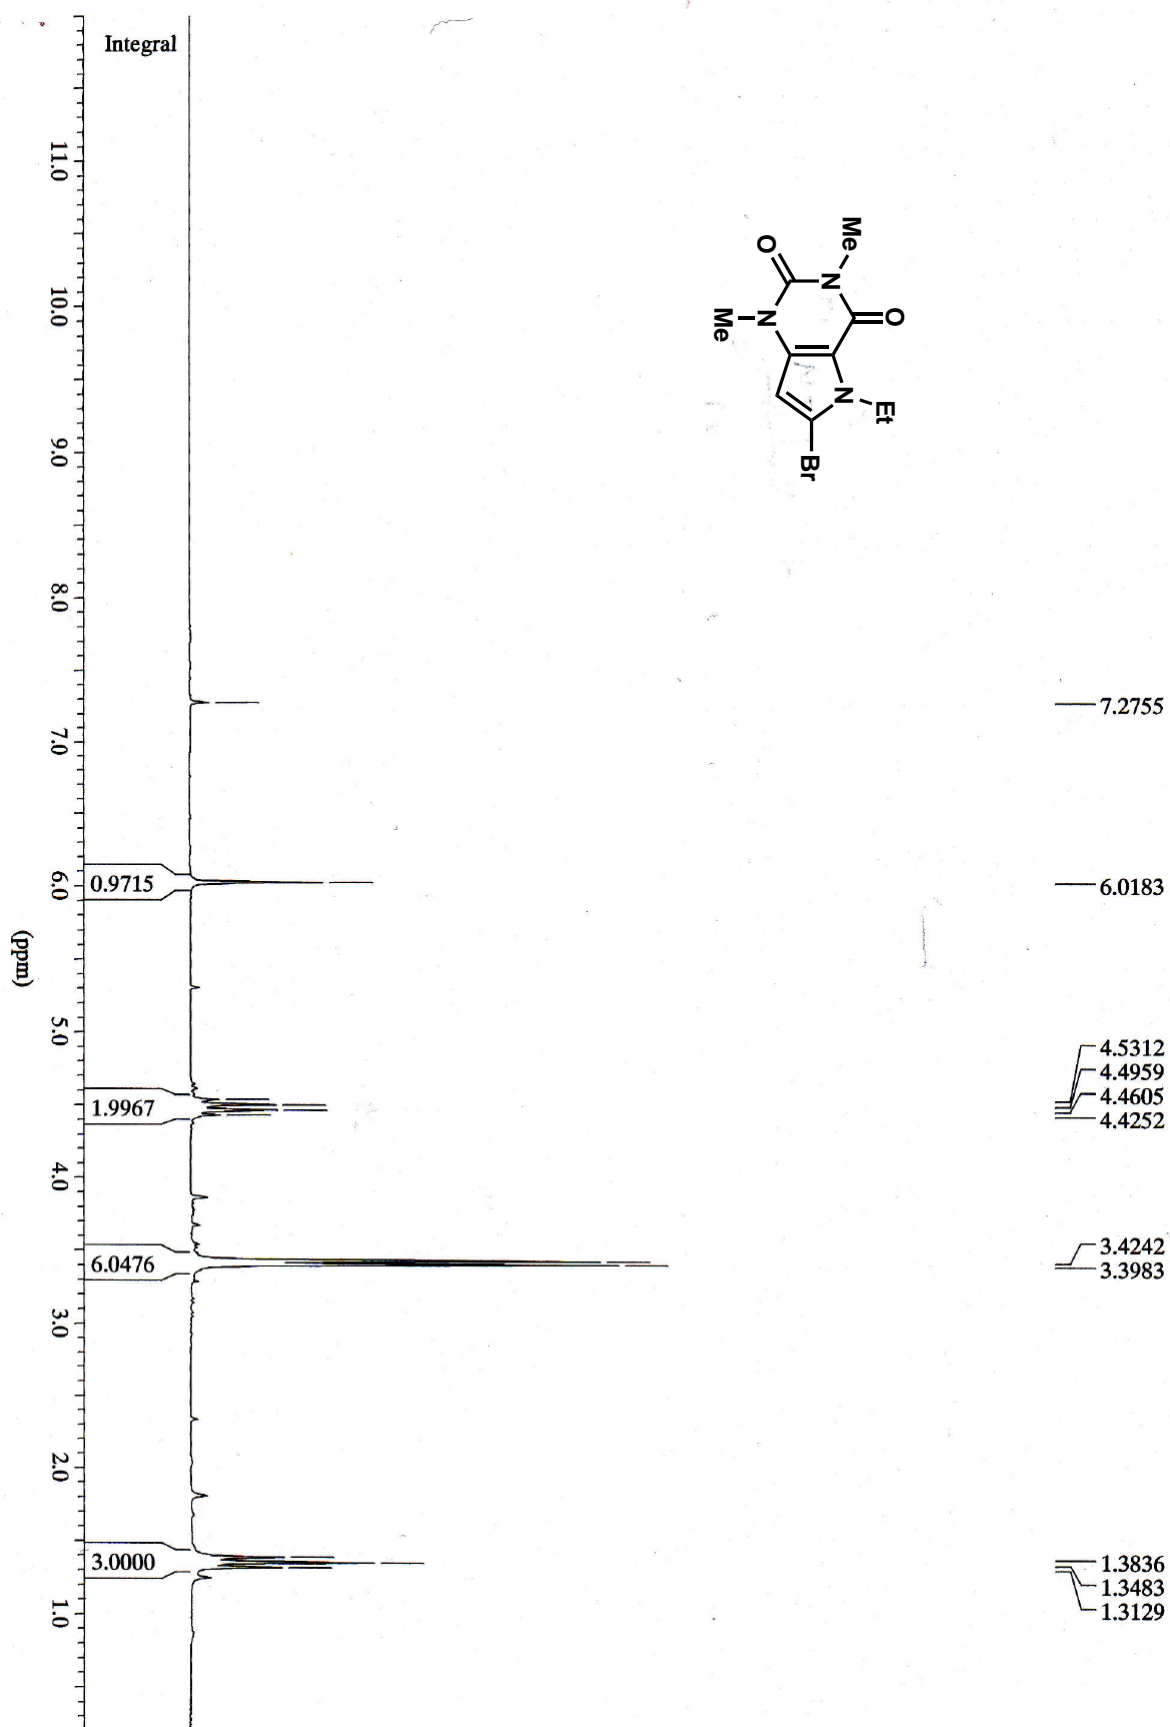

Compound 8c

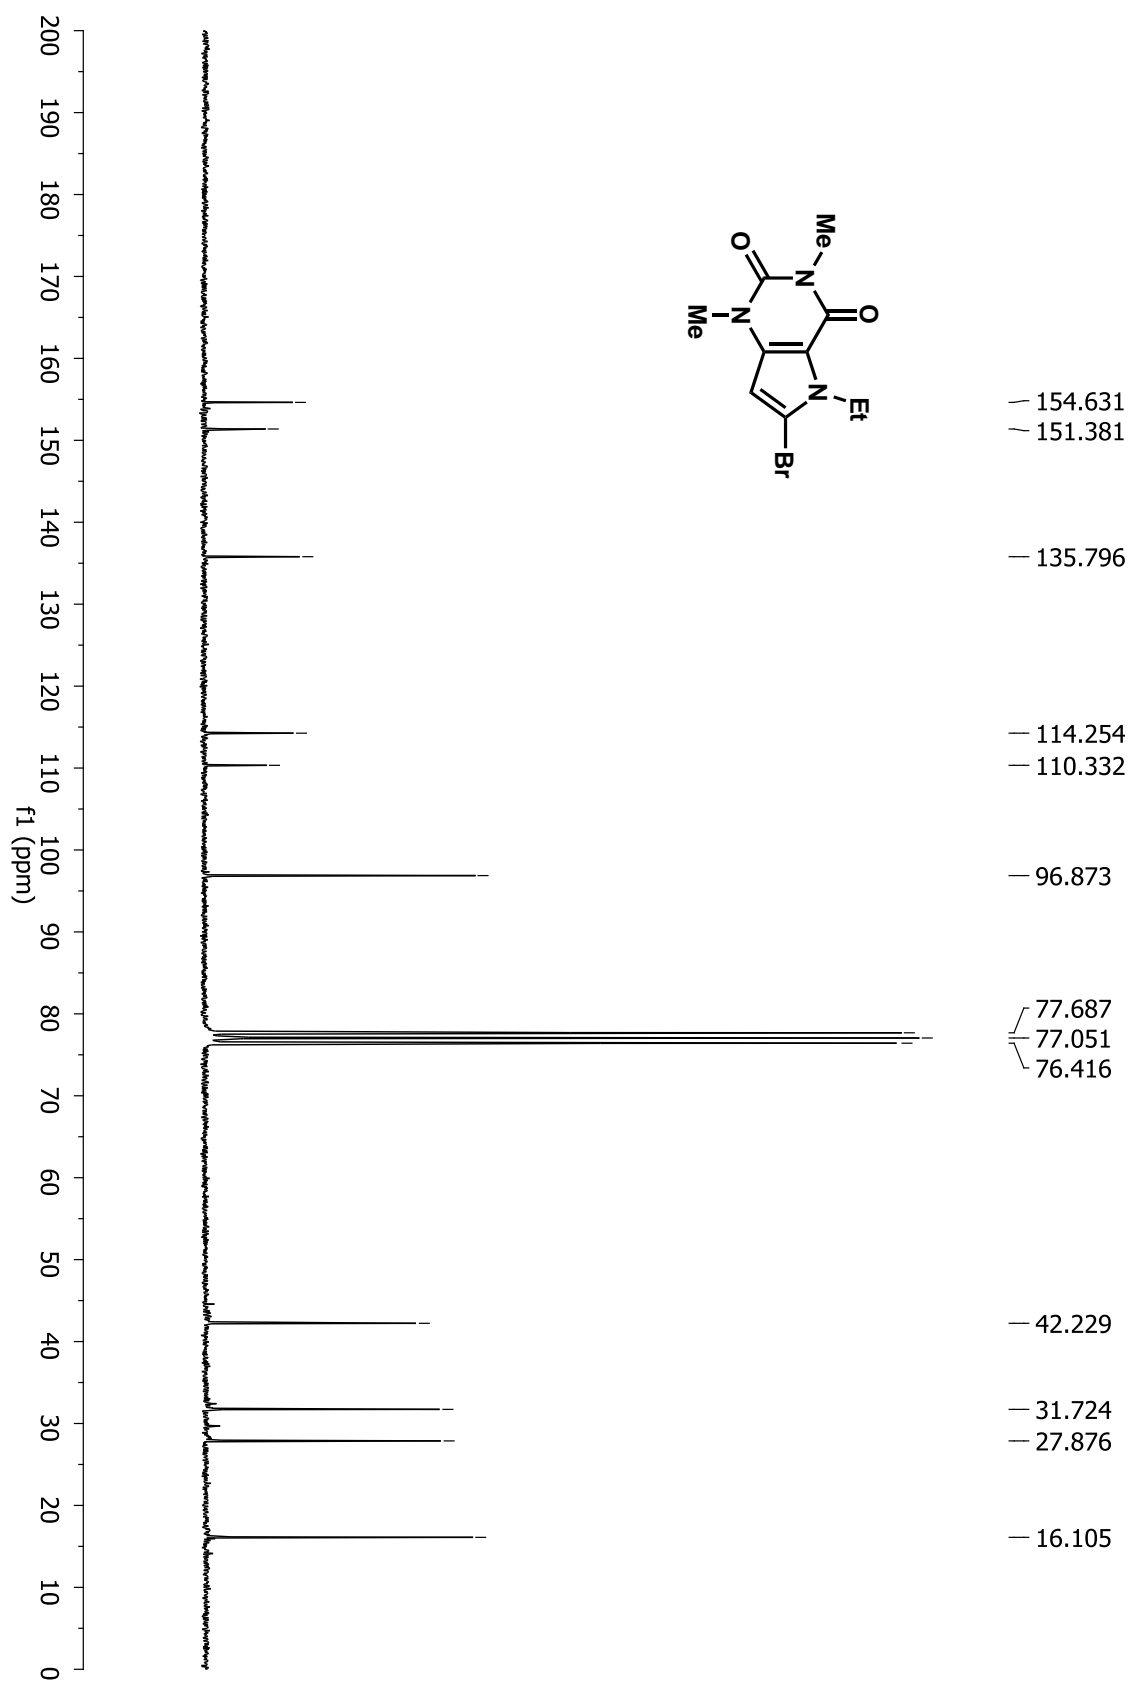

Compound 9a

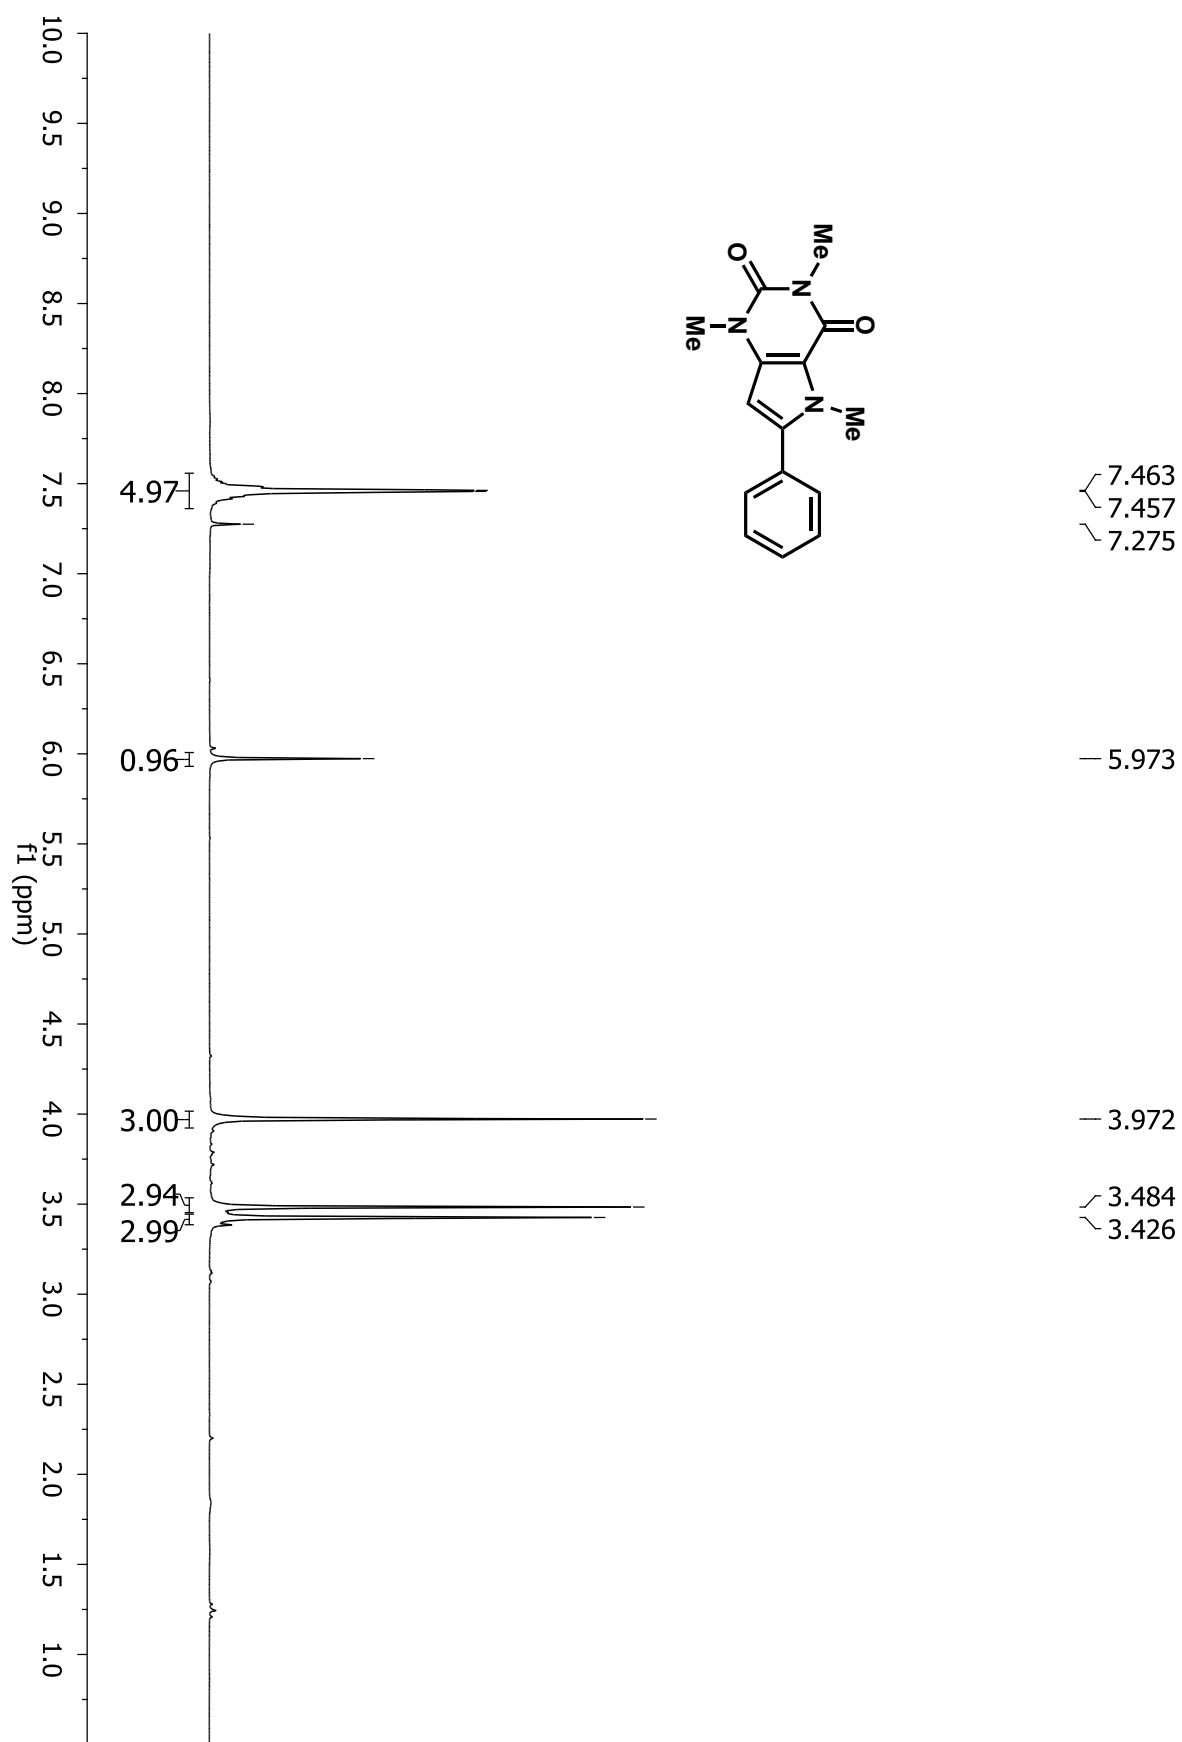

Compound 9a

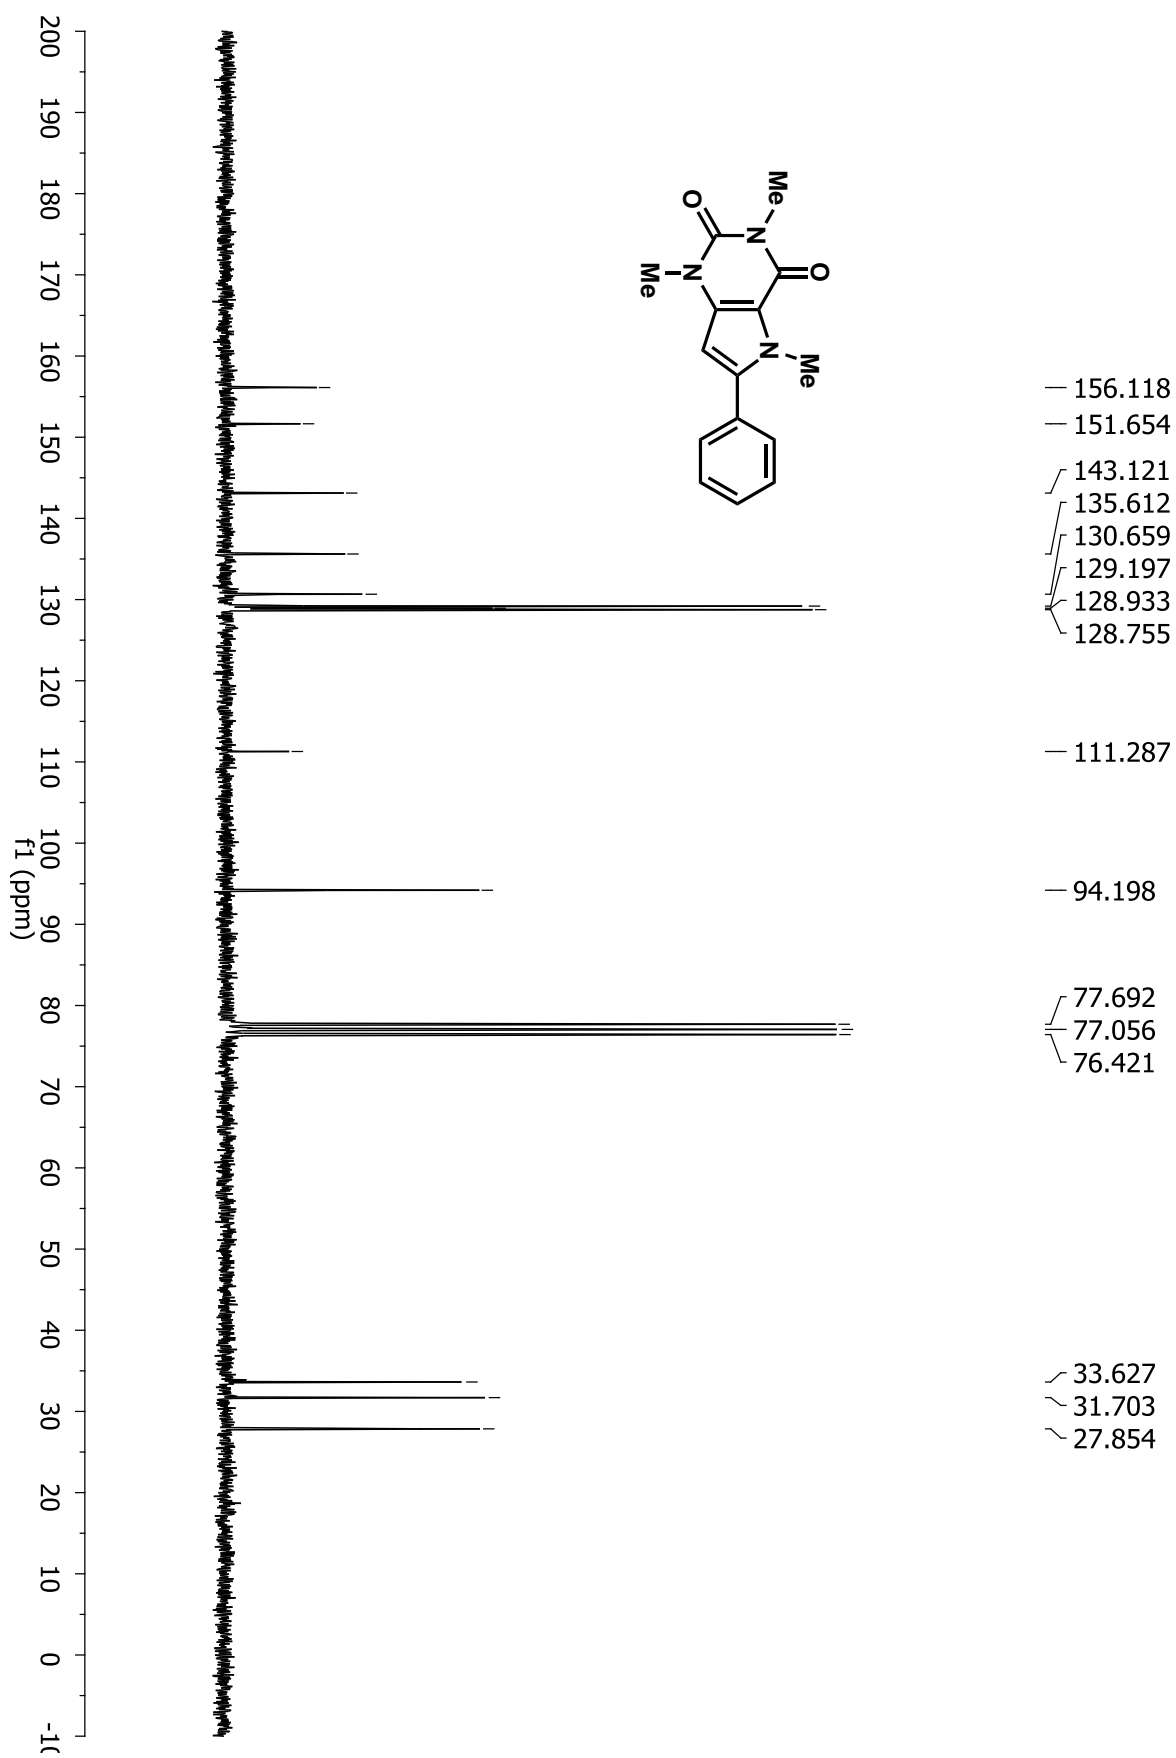

Compound 9b

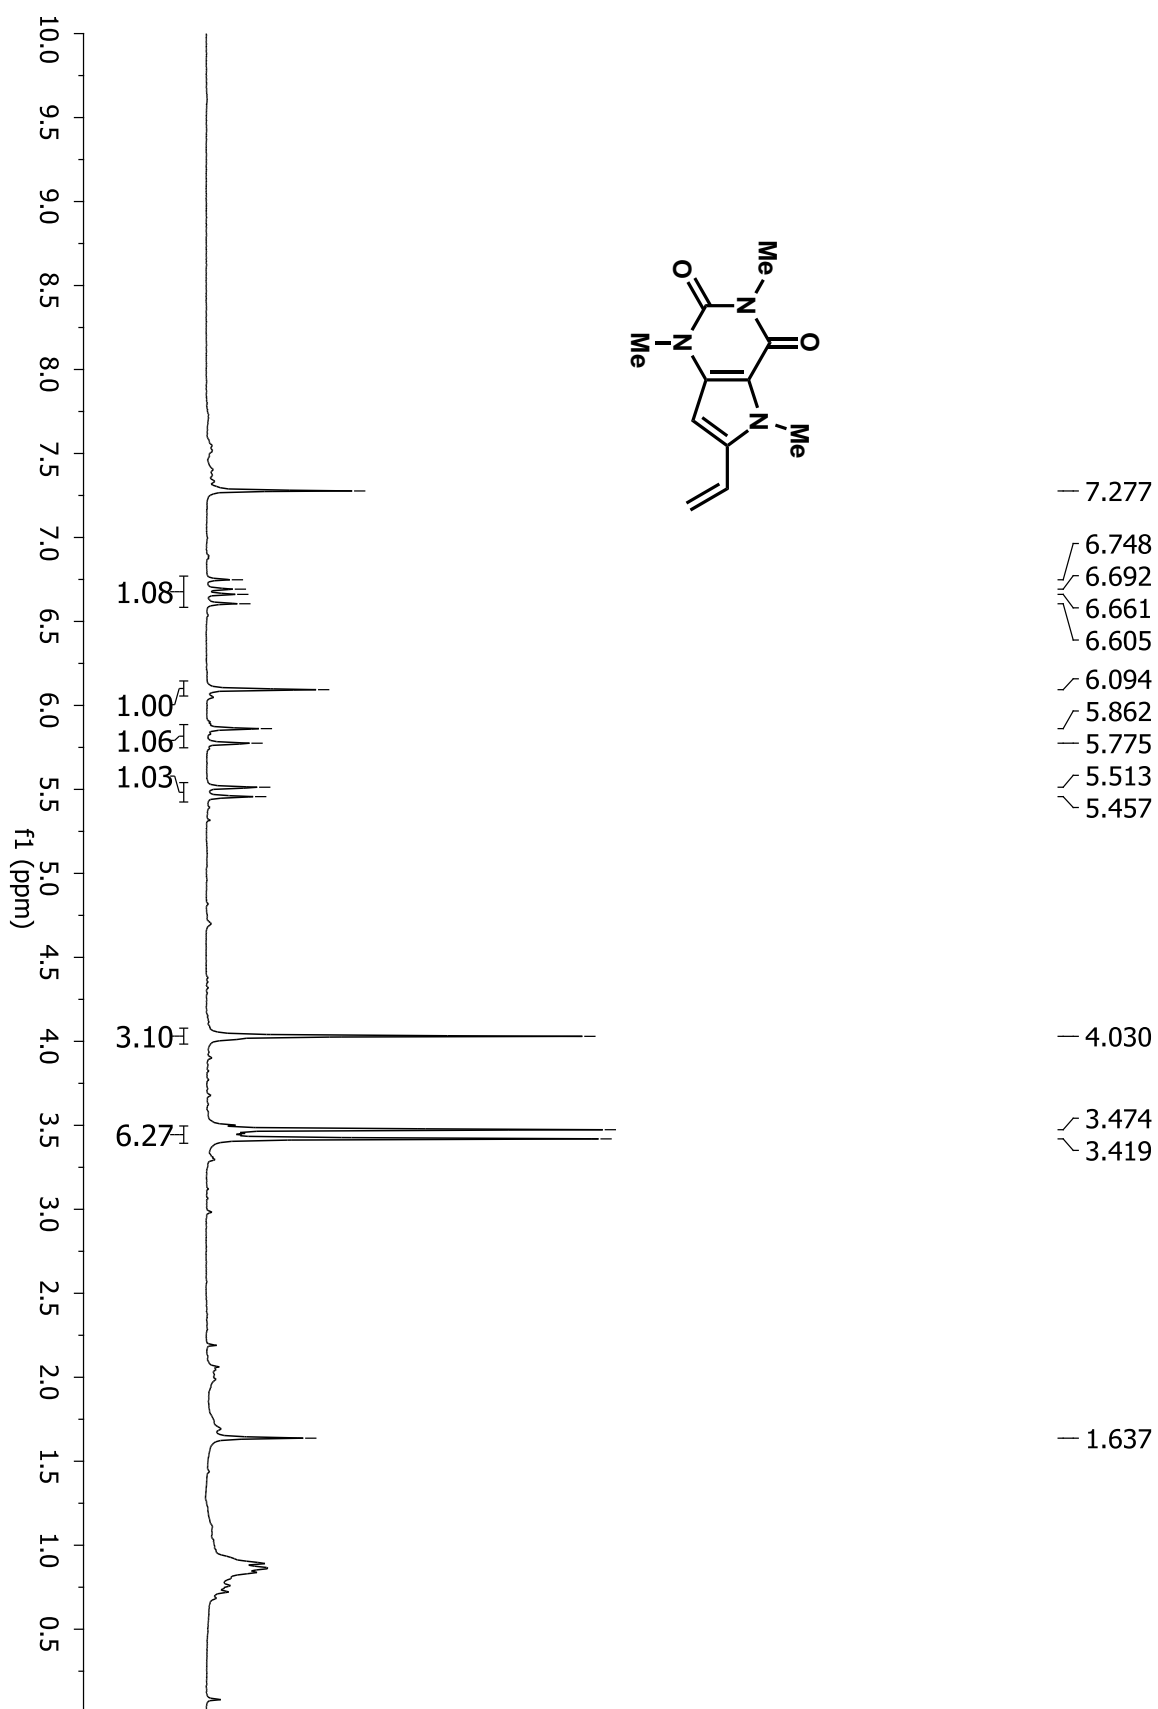

Compound 9b

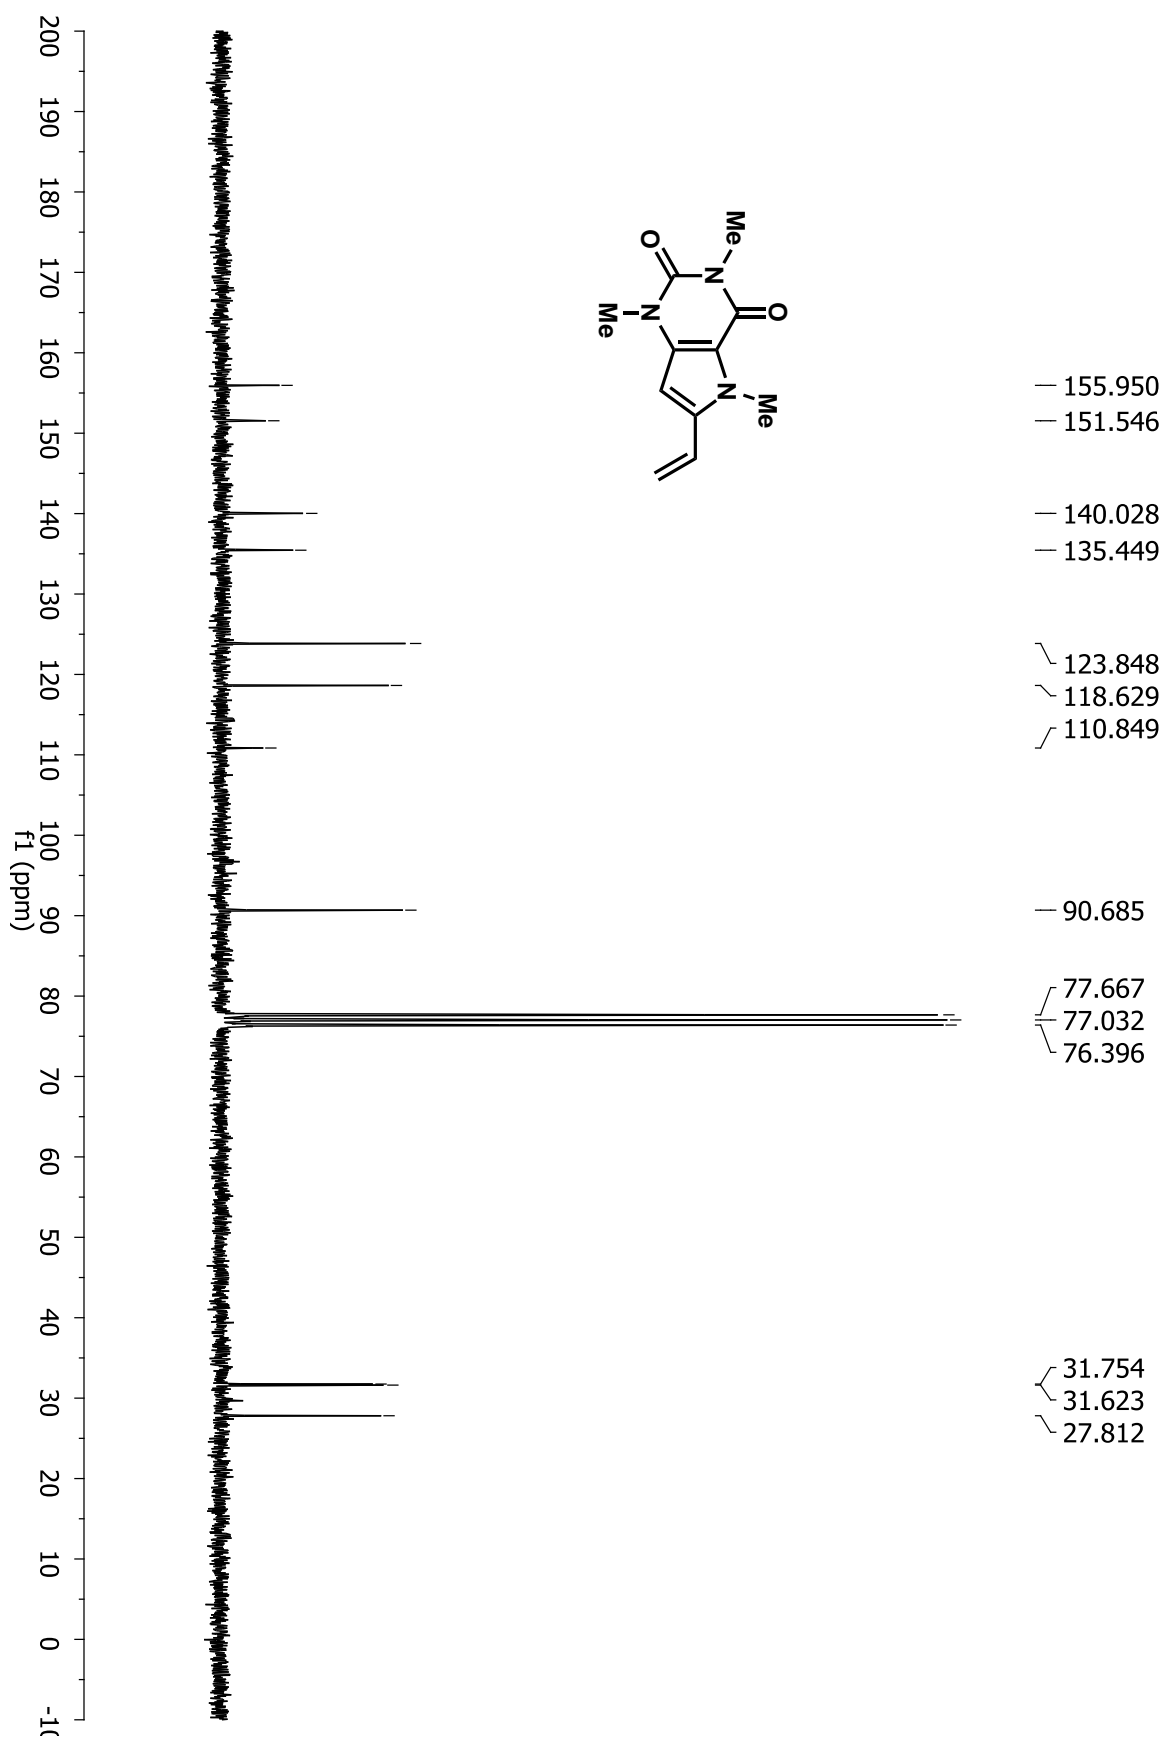

Compound 9c

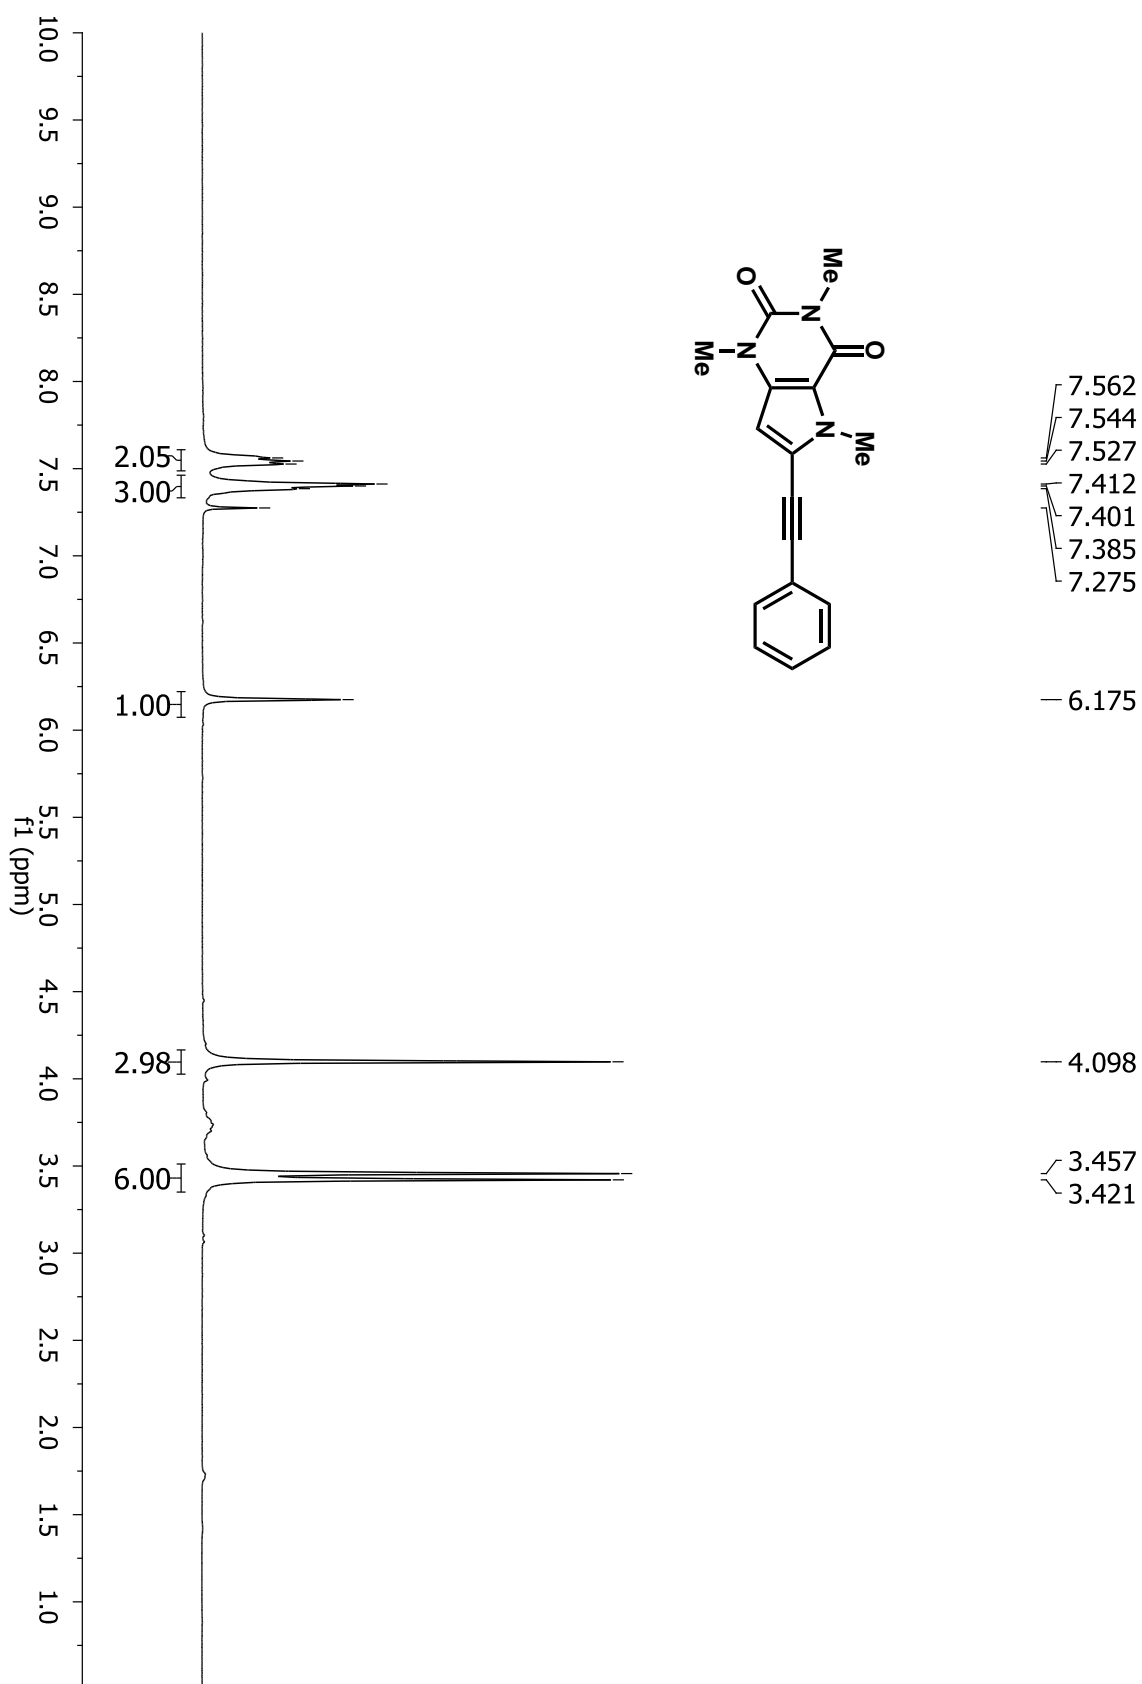

Compound 9c

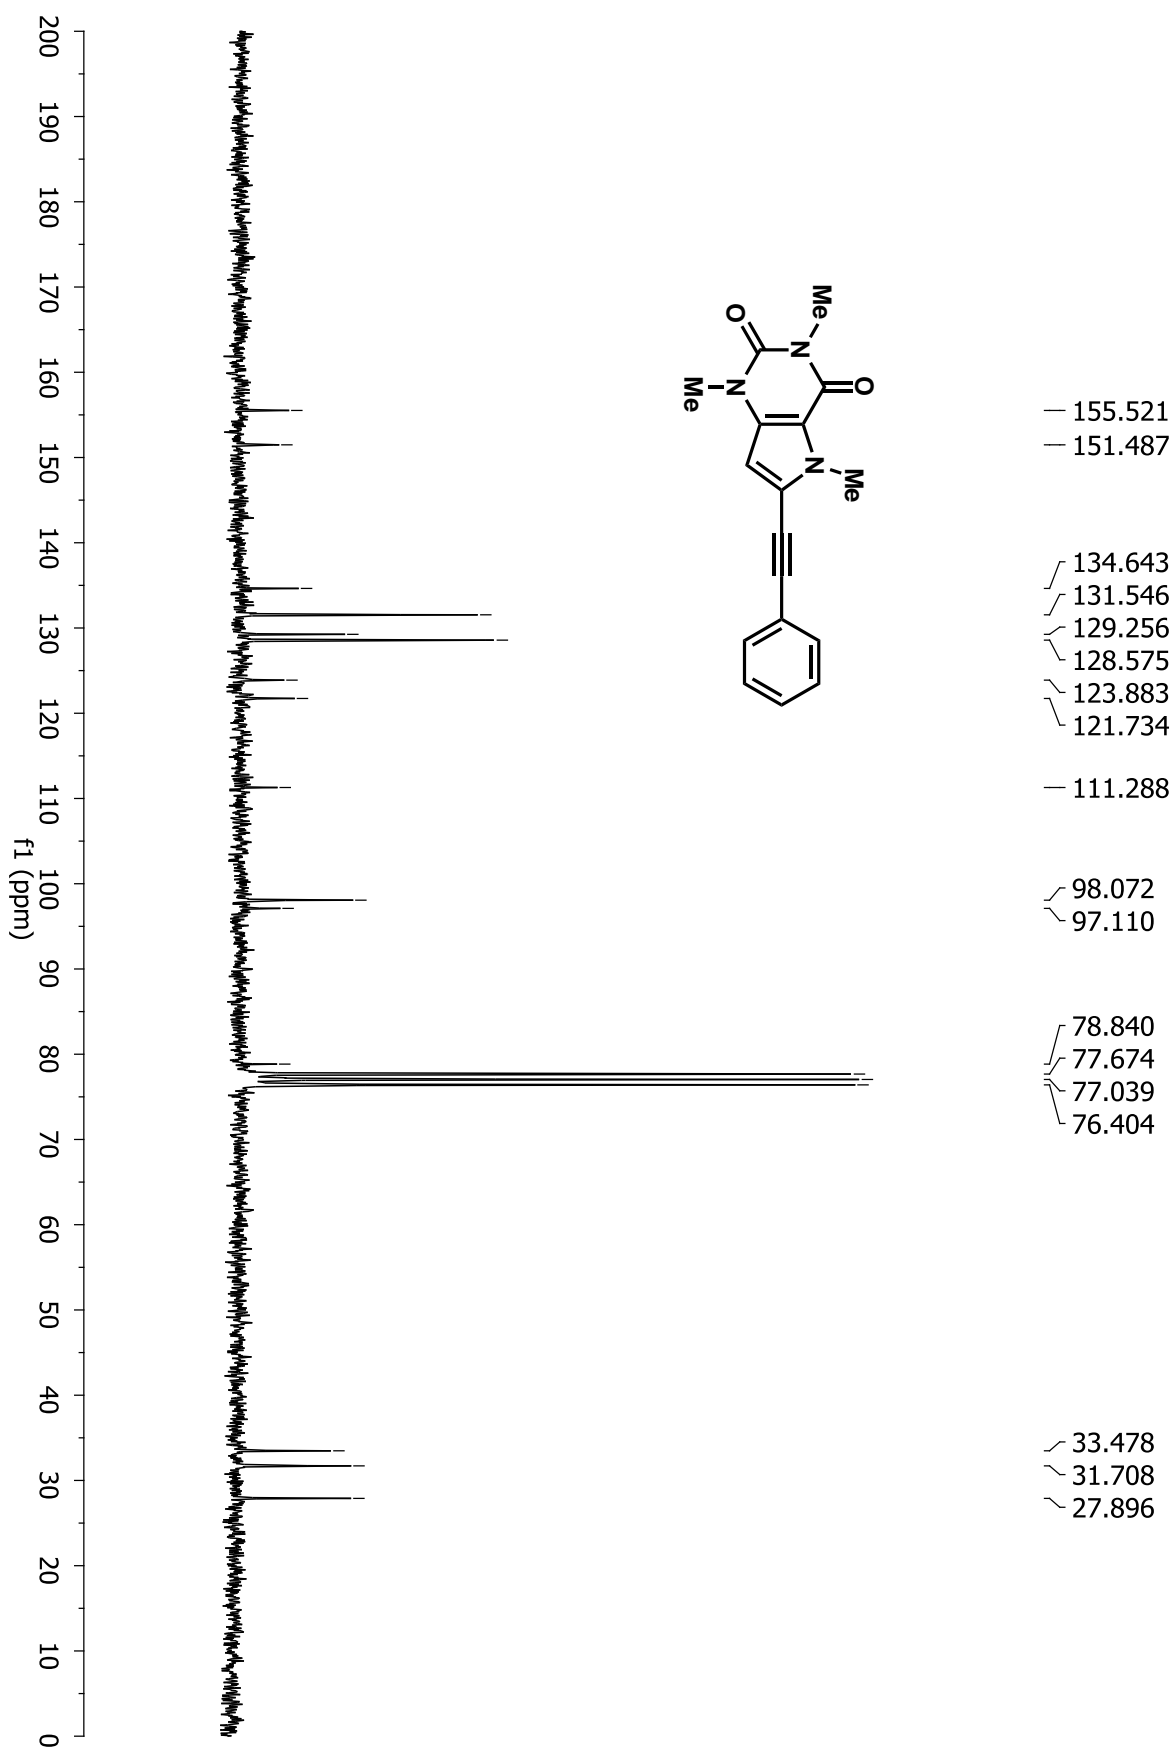



Compound 9d

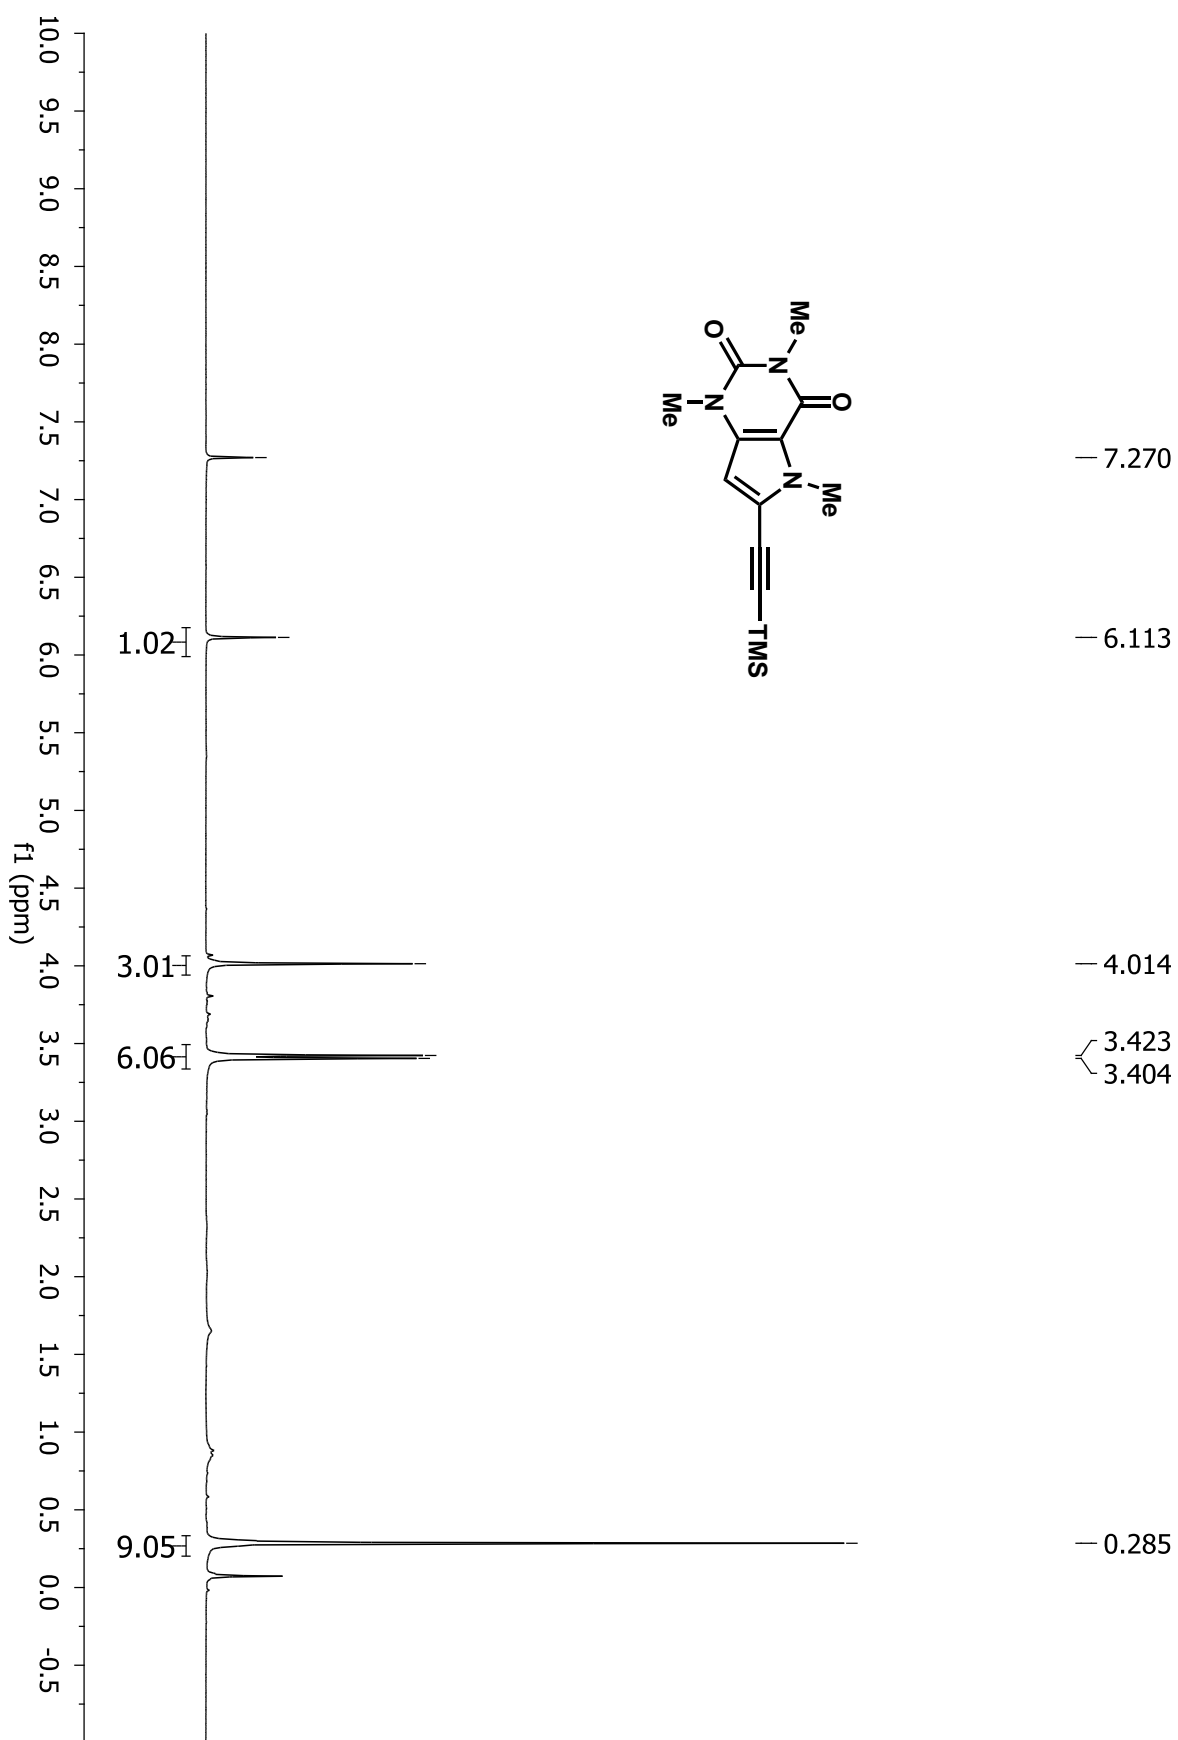

Compound 9d

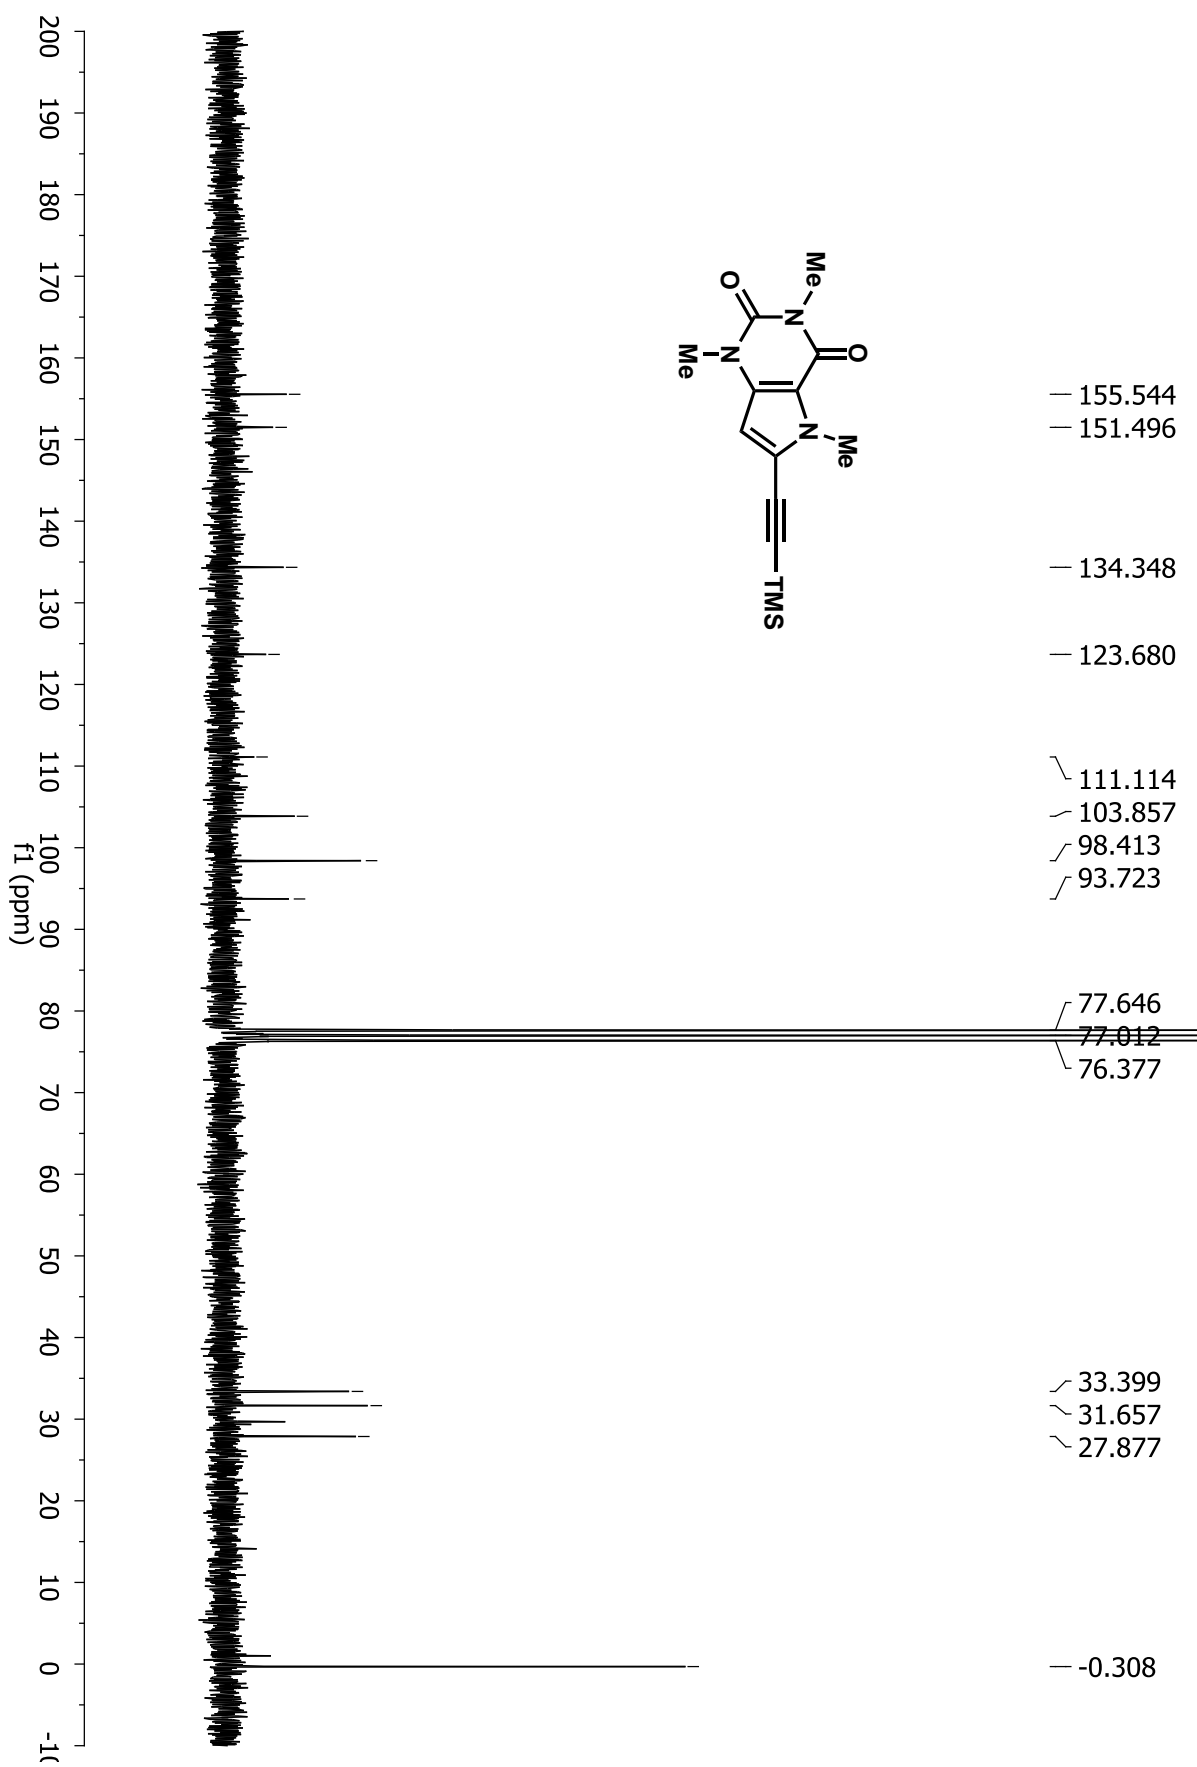

Compound 9e

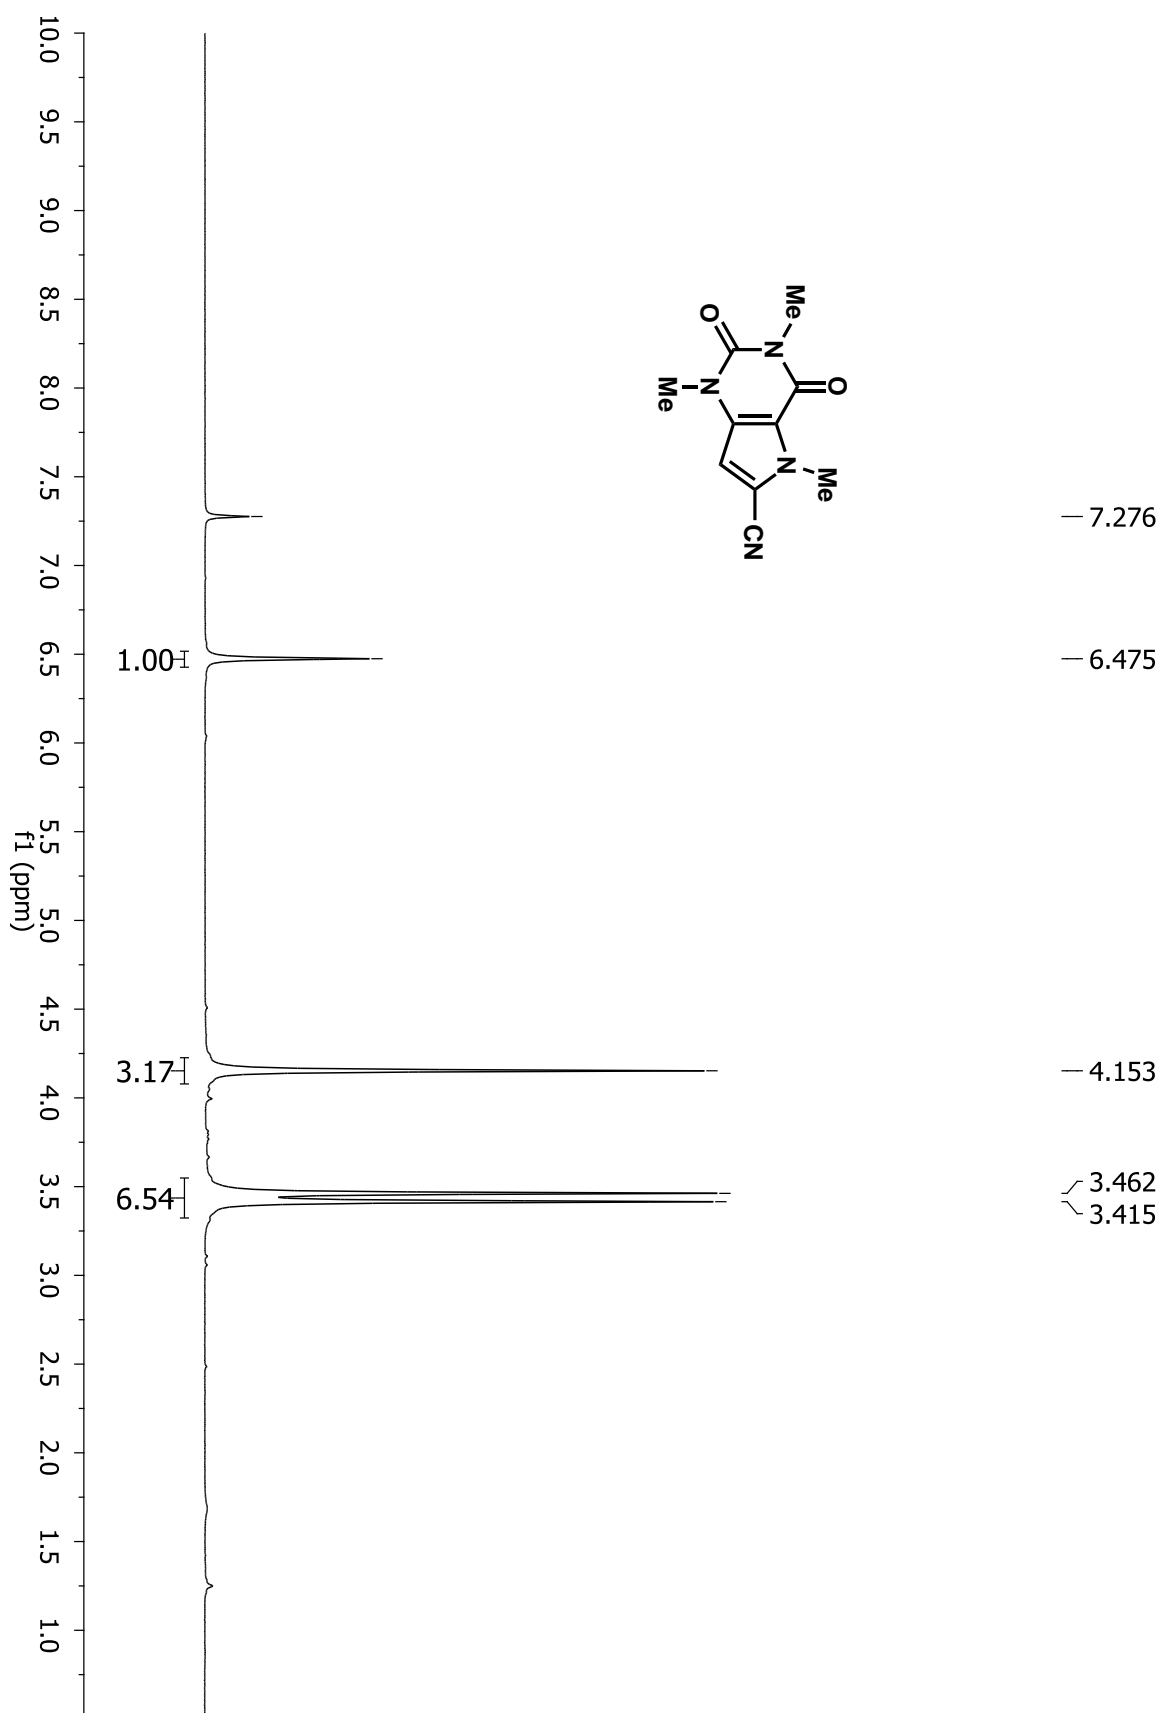

Compound 9e

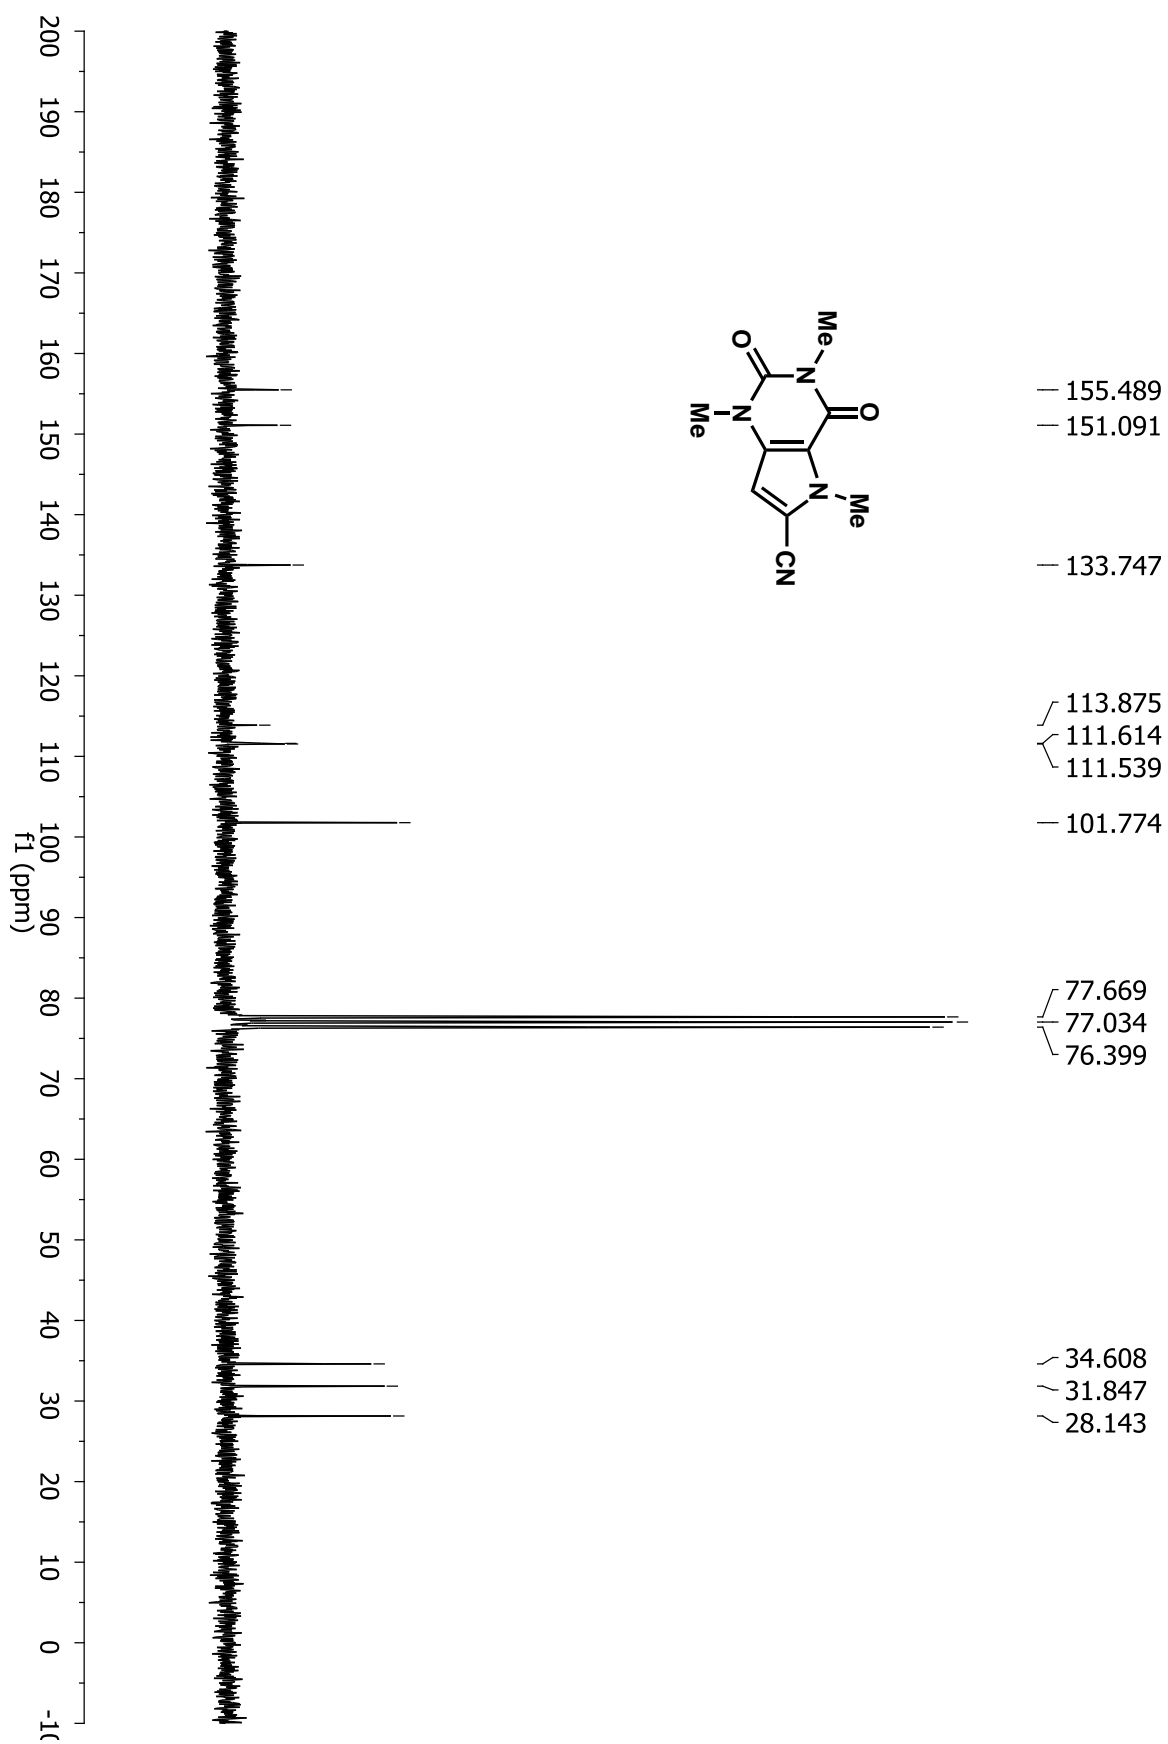

Compound 9f

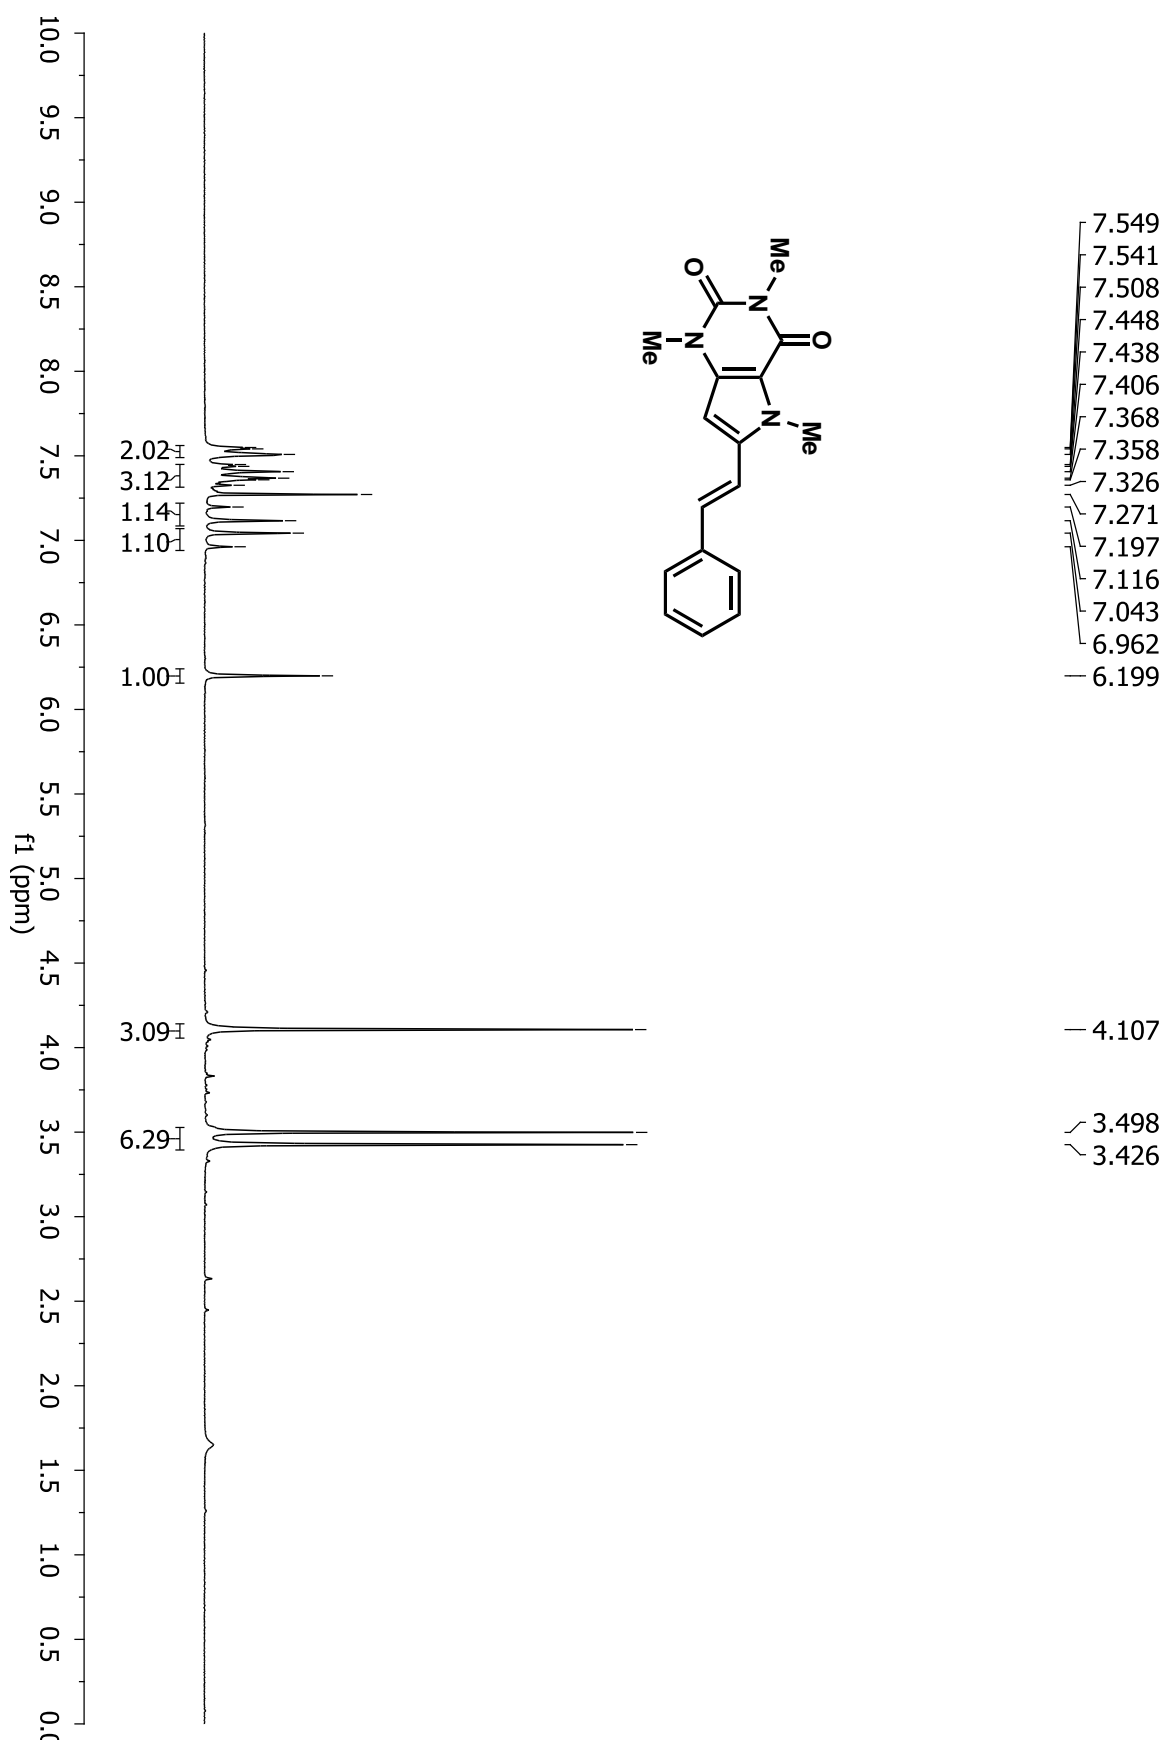

Compound 9f

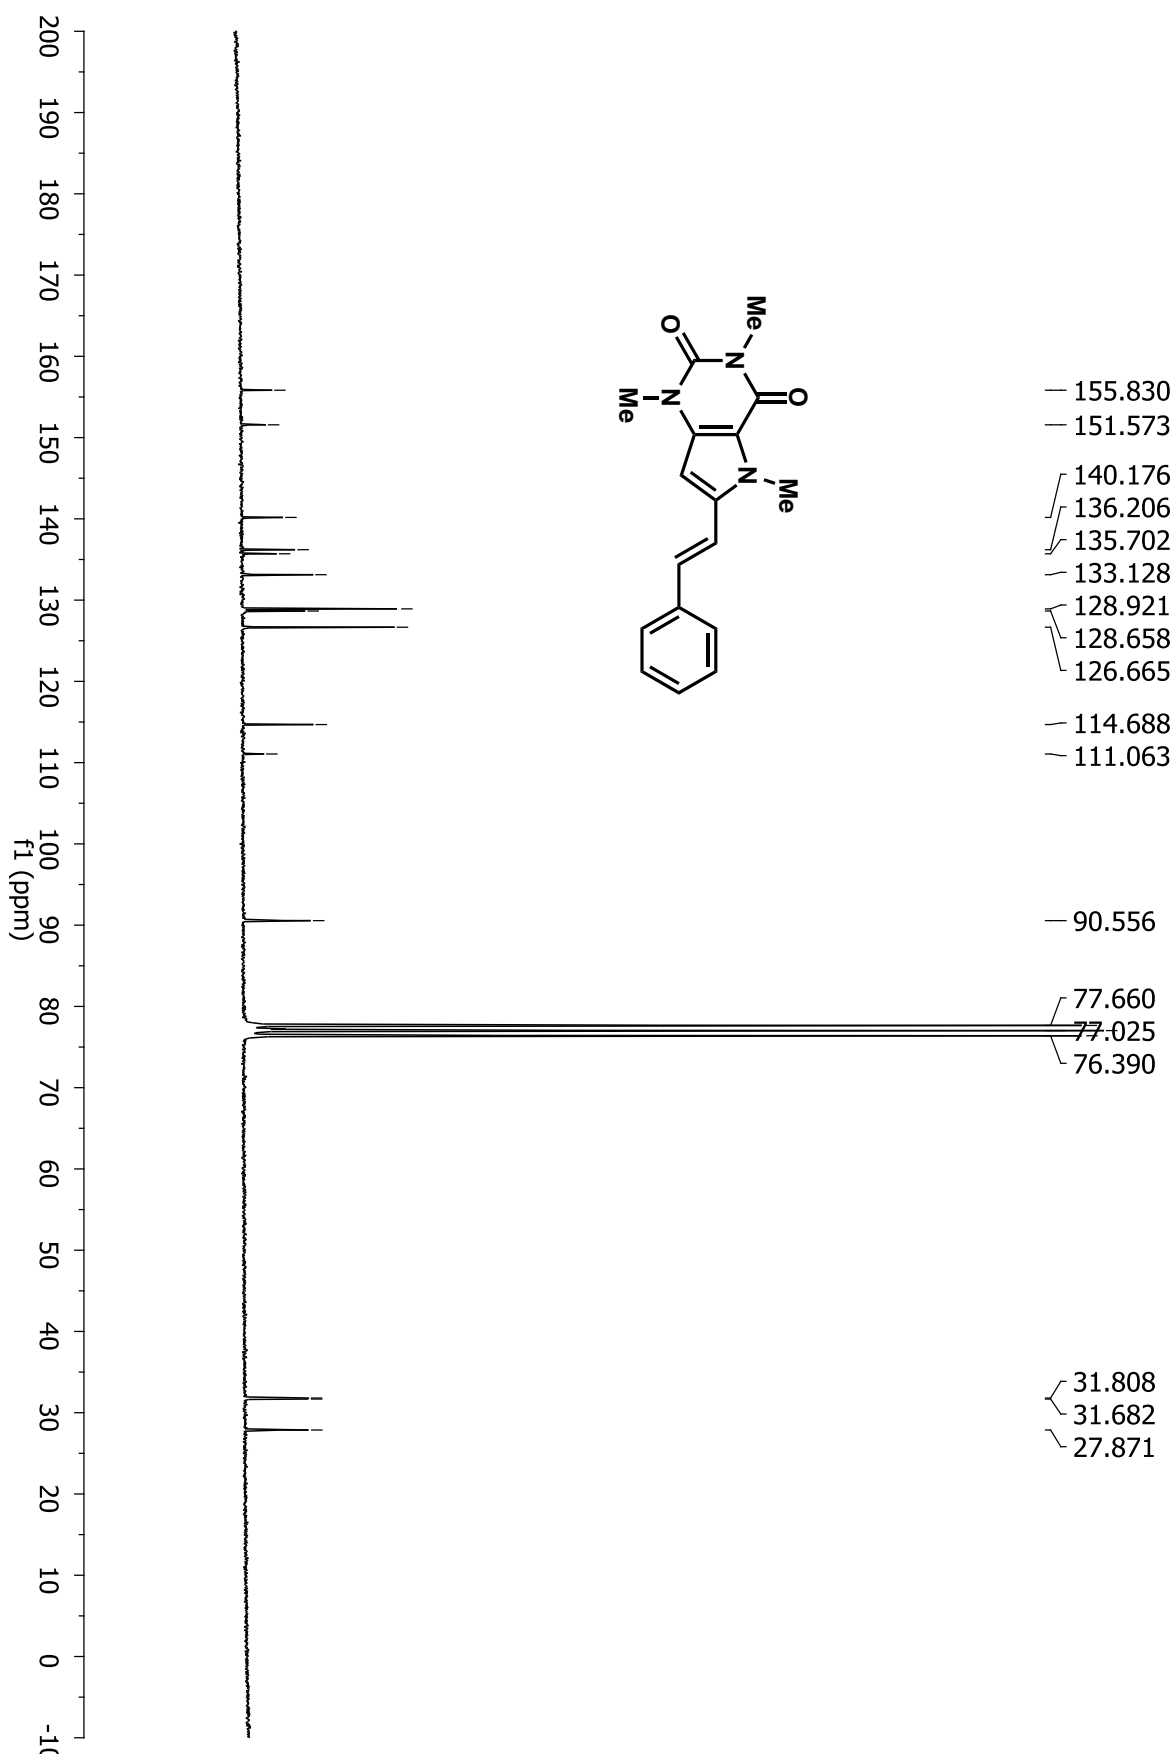

Compound 9g

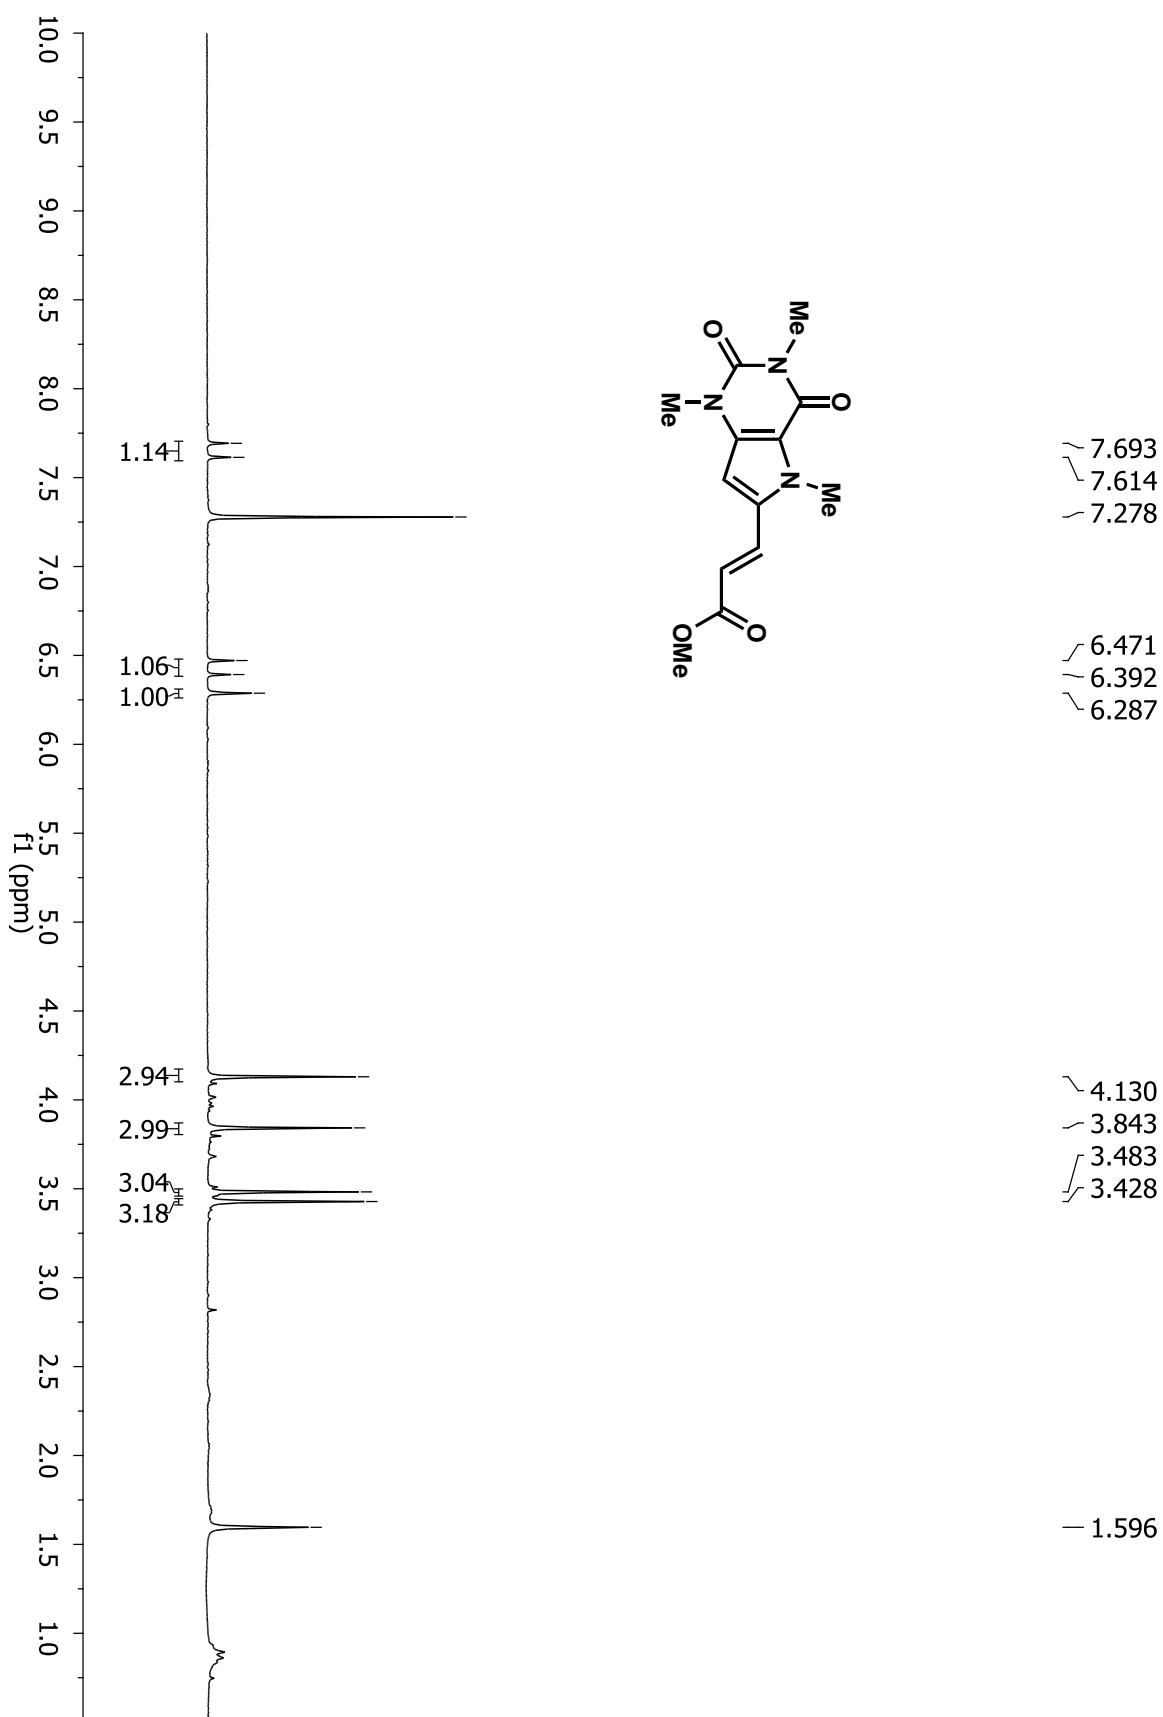

Compound 9g

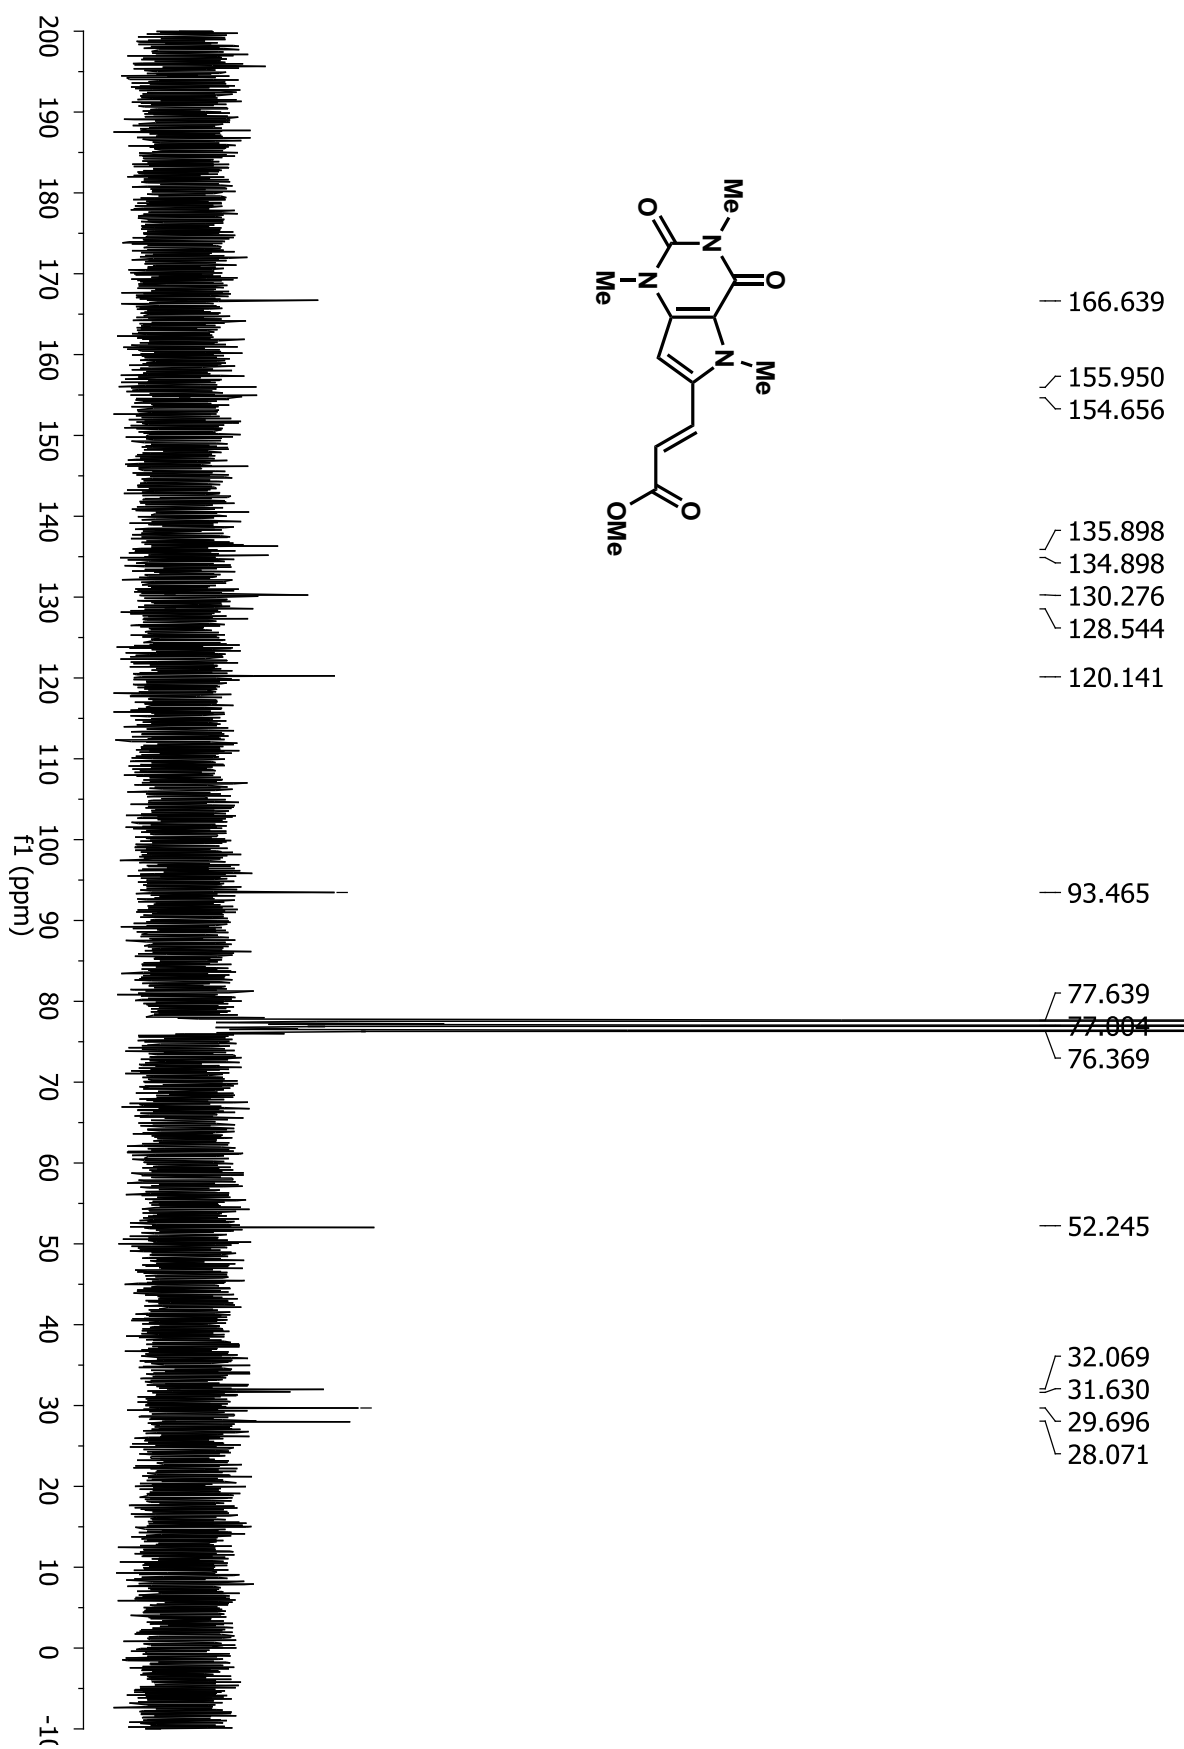



Compound 9h

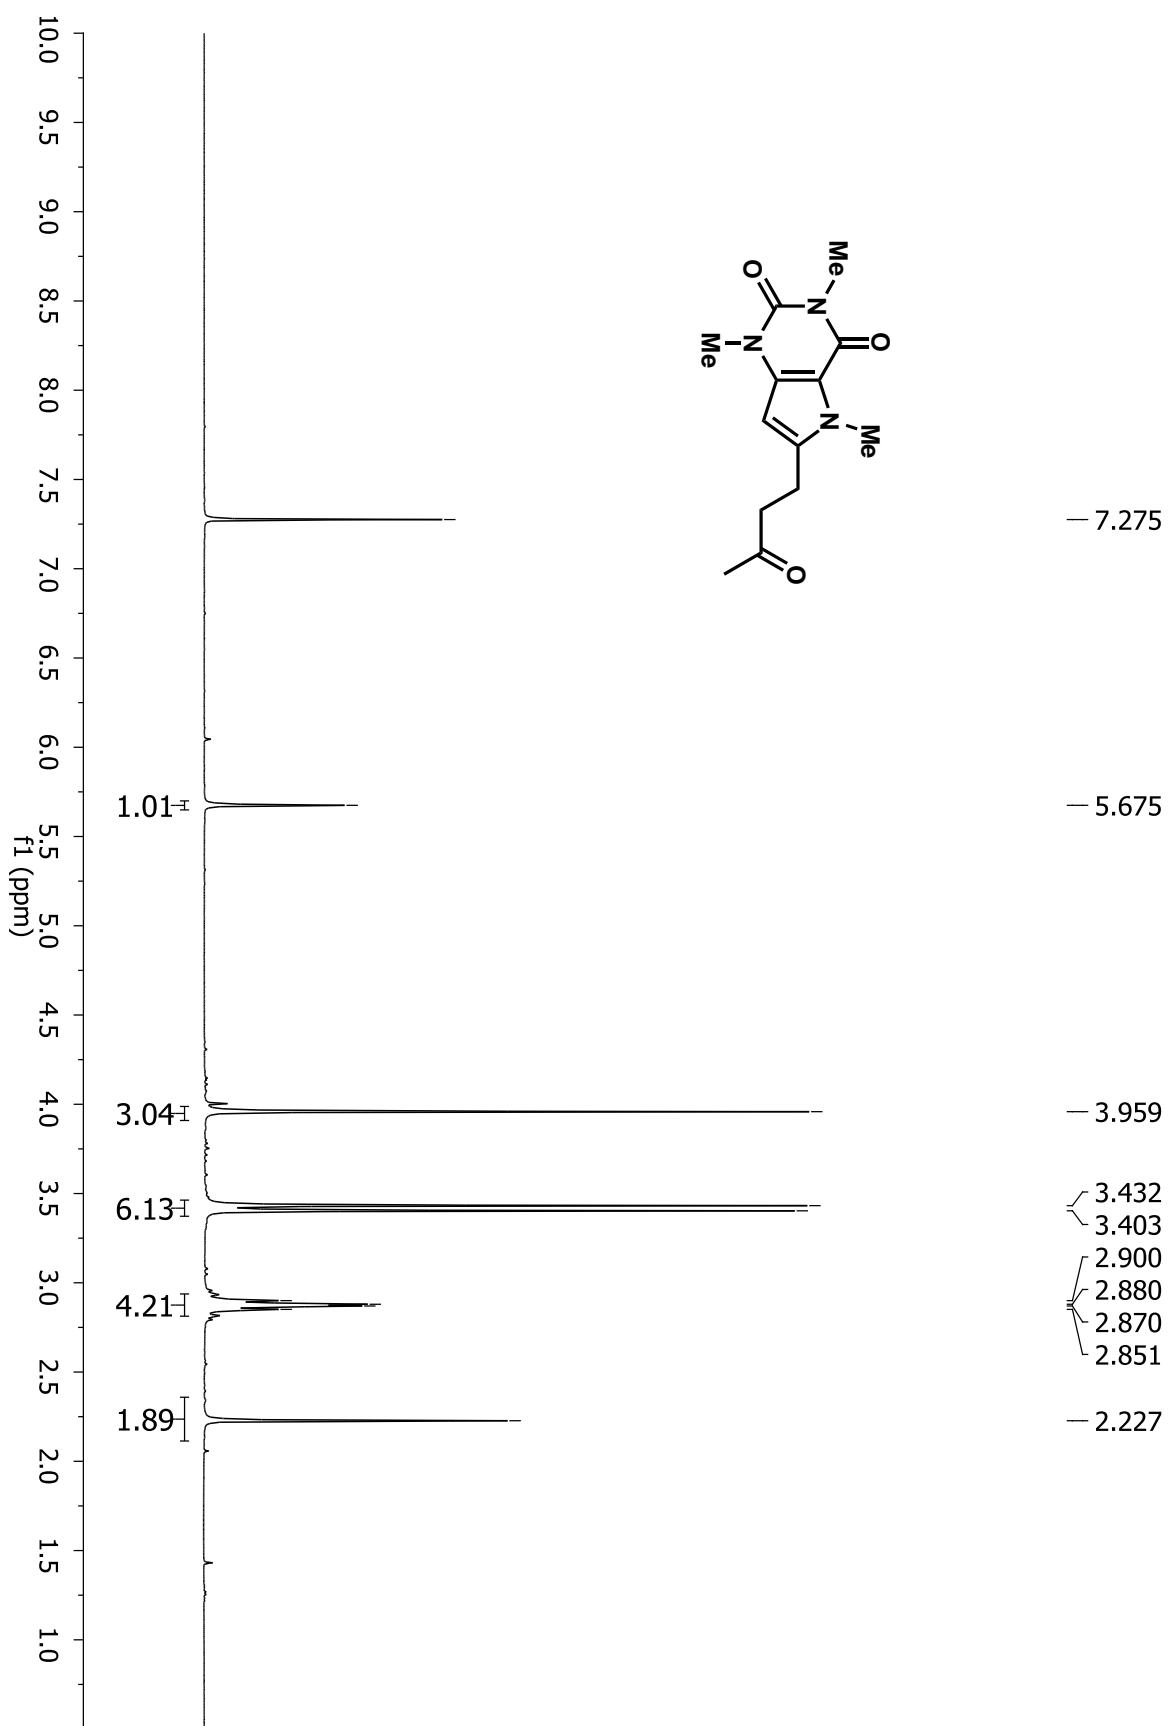

### Compound 9h

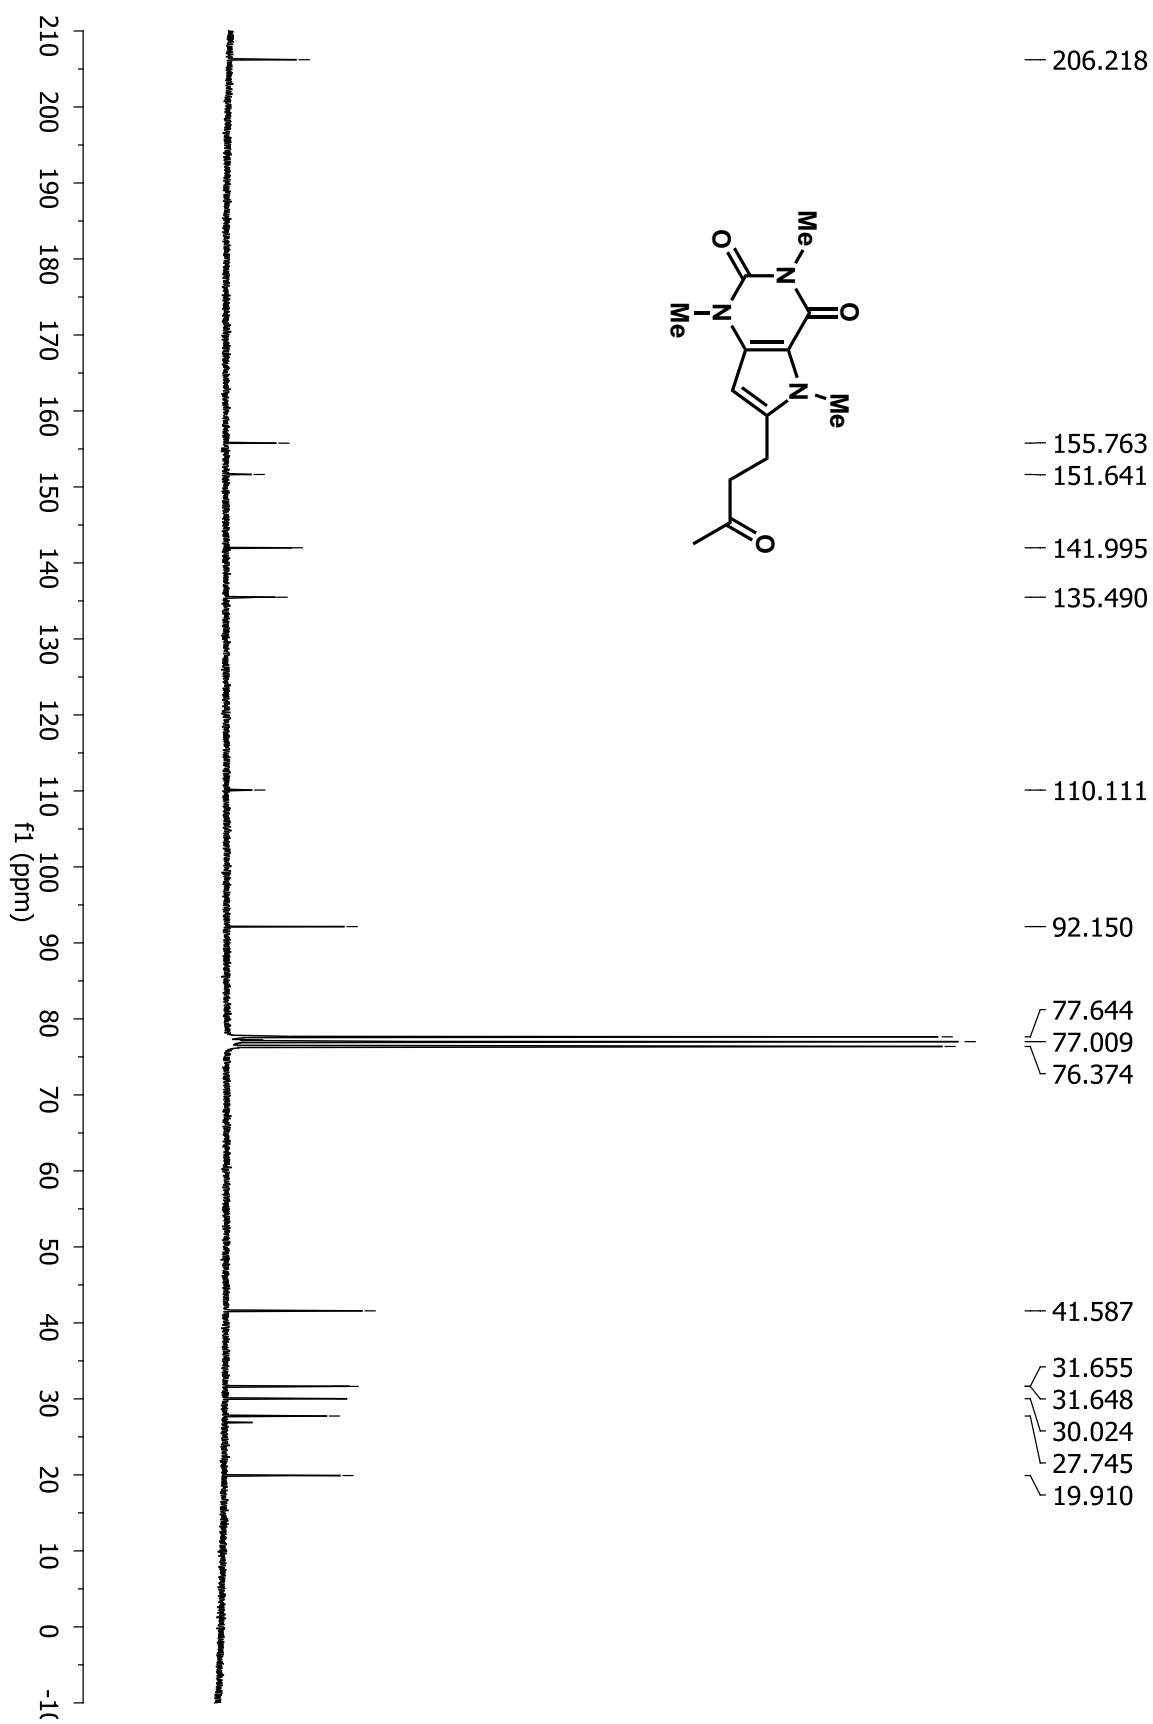

Compound 9i

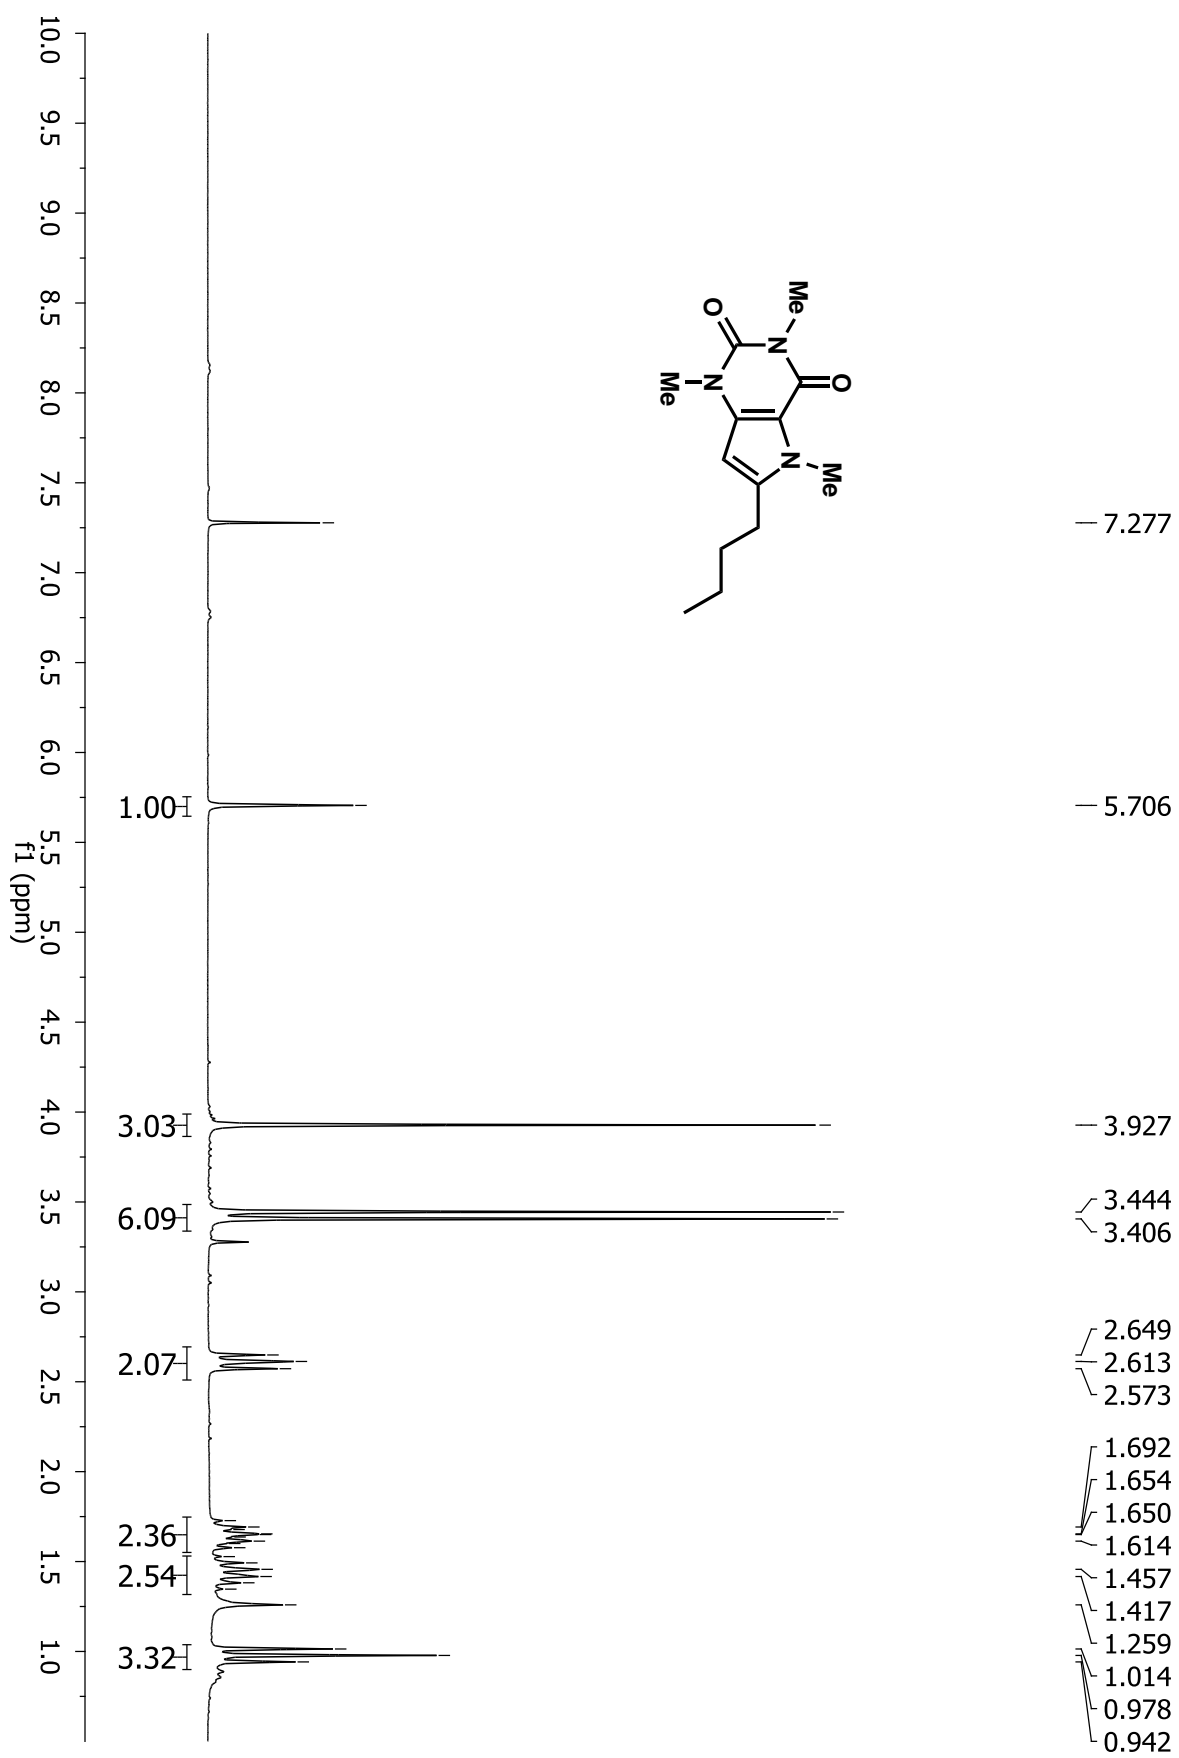

Compound 9i

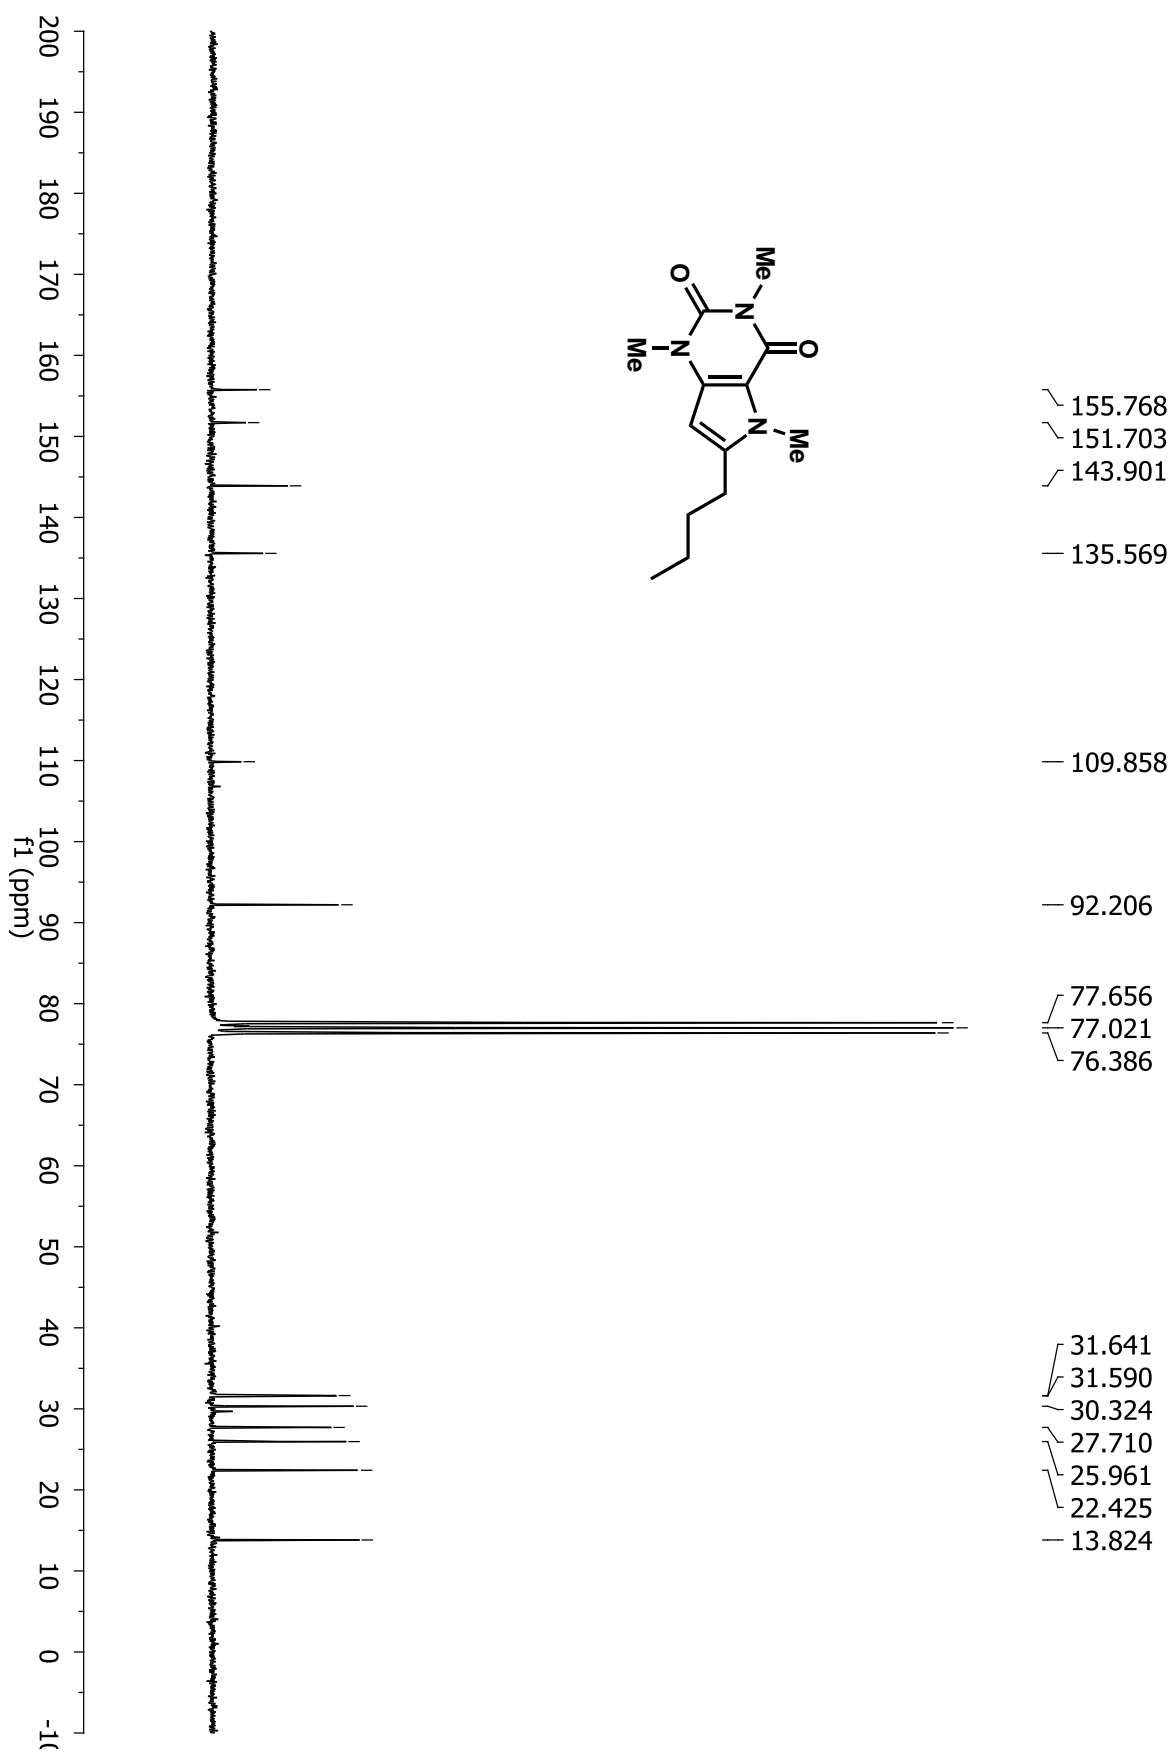

Supplement: c2ob26516h.pdf [file c2ob26516h.pdf]
